# Supplementary material for: Immediate ecotoxicological effects of short-lived oil spills on marine biota
Source: PubMed Central journal article supplement (PMC4822028; doi:10.1038/ncomms11206), 2016-04-04
Supplement: ncomms11206-s1.pdf [file ncomms11206-s1.pdf]

### a, ES-2008

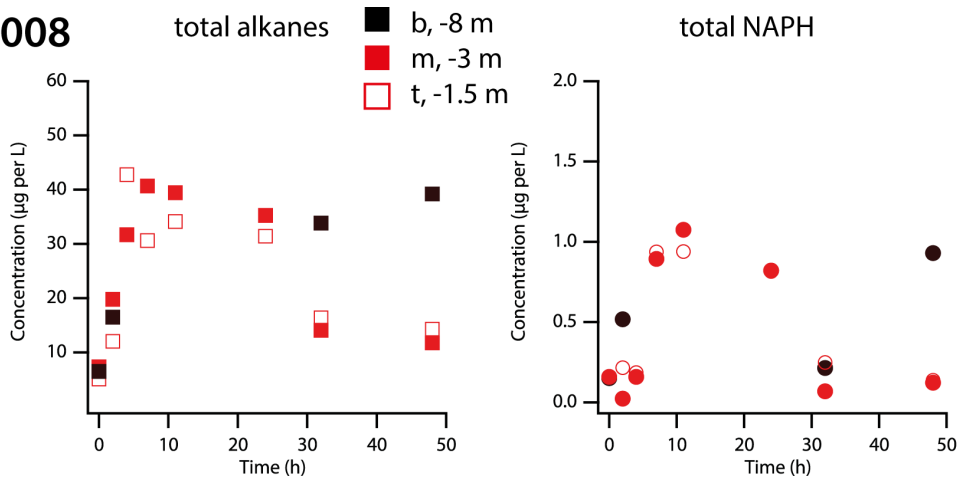

### b, ES-2009

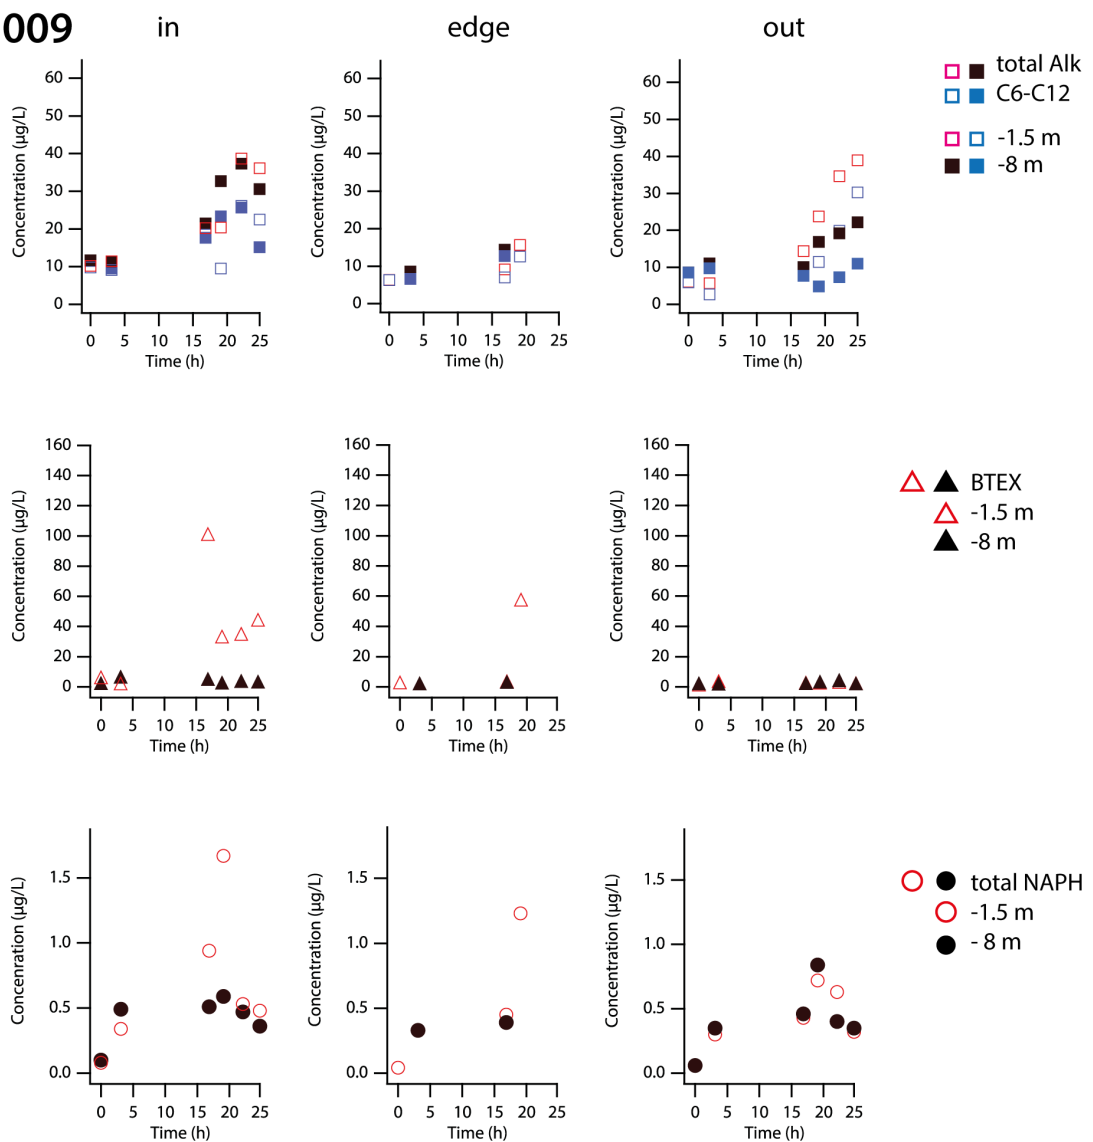

Supplementary Figure 2. Dissolution and weathering kinetics of dissolved oil components in the ES-2008 (a) and ES-2009 (b) spills, at all sampled depths. Total Naph, sum of naphthalene, methyl- and dimethylnaphthalenes. Total alk, sum of linear alkanes between C10 and C40 (ES-2008), or C6-C40 (ES-2009). BTEX, sum of benzene, toluene, ethylbenzene and xylenes.

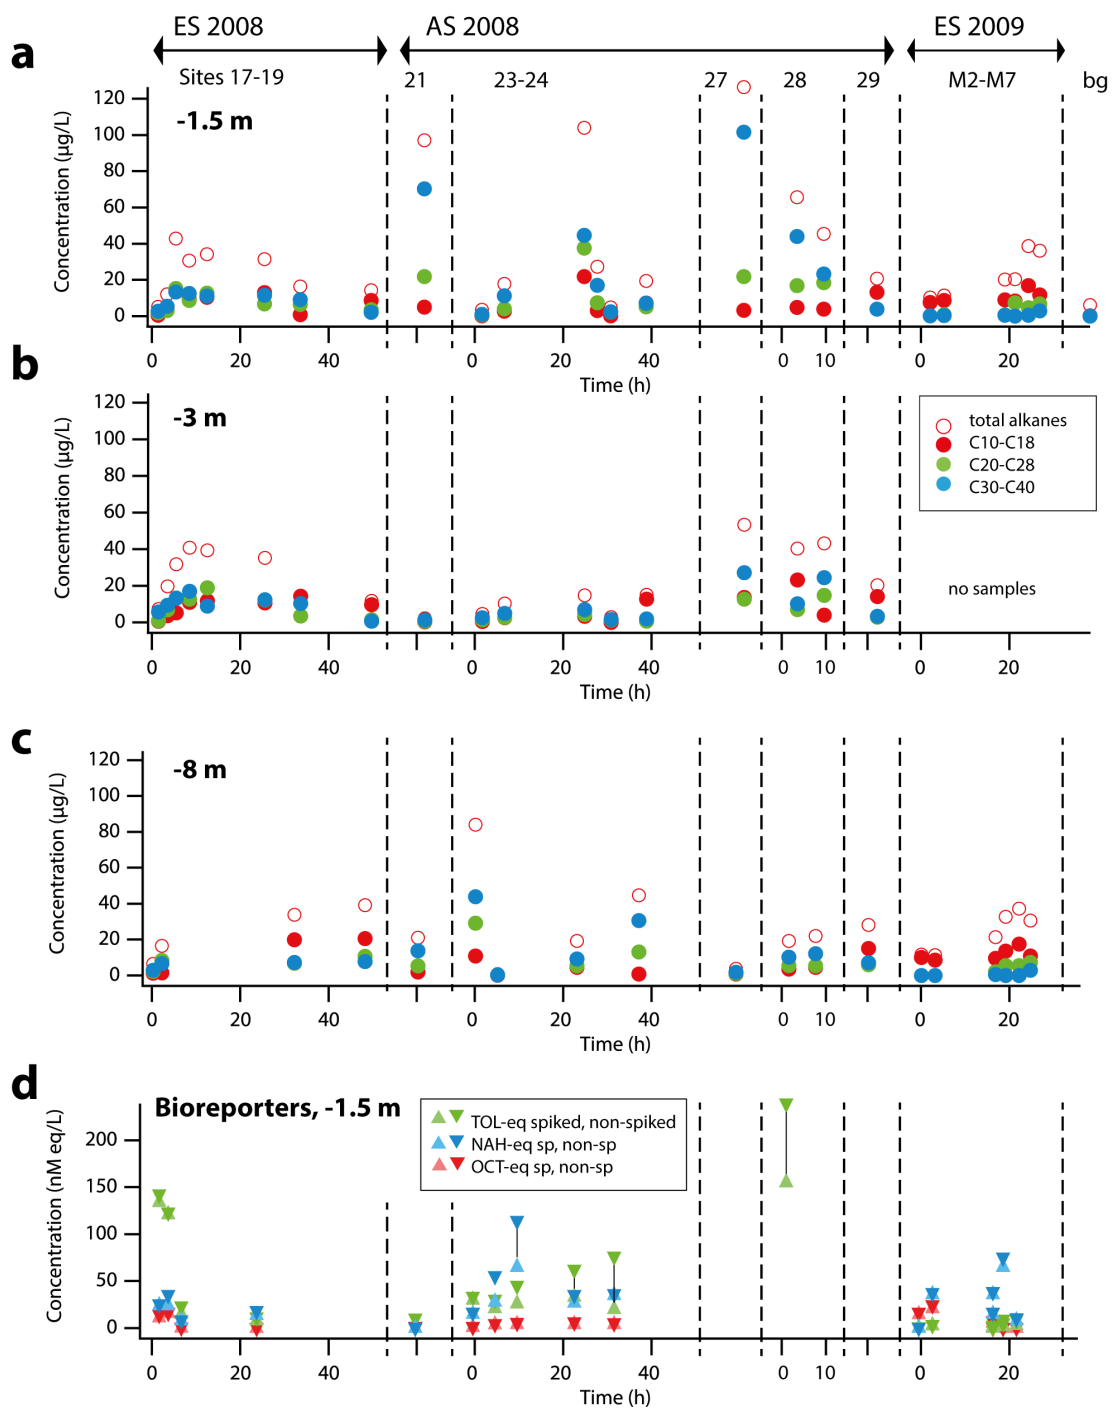

Supplementary Figure 3. Depth profile concentrations of sum alkane parameters and bioreporter measurements across all open sea spills. For description of sampling points and sites, see Table S2 and Fig. 1.

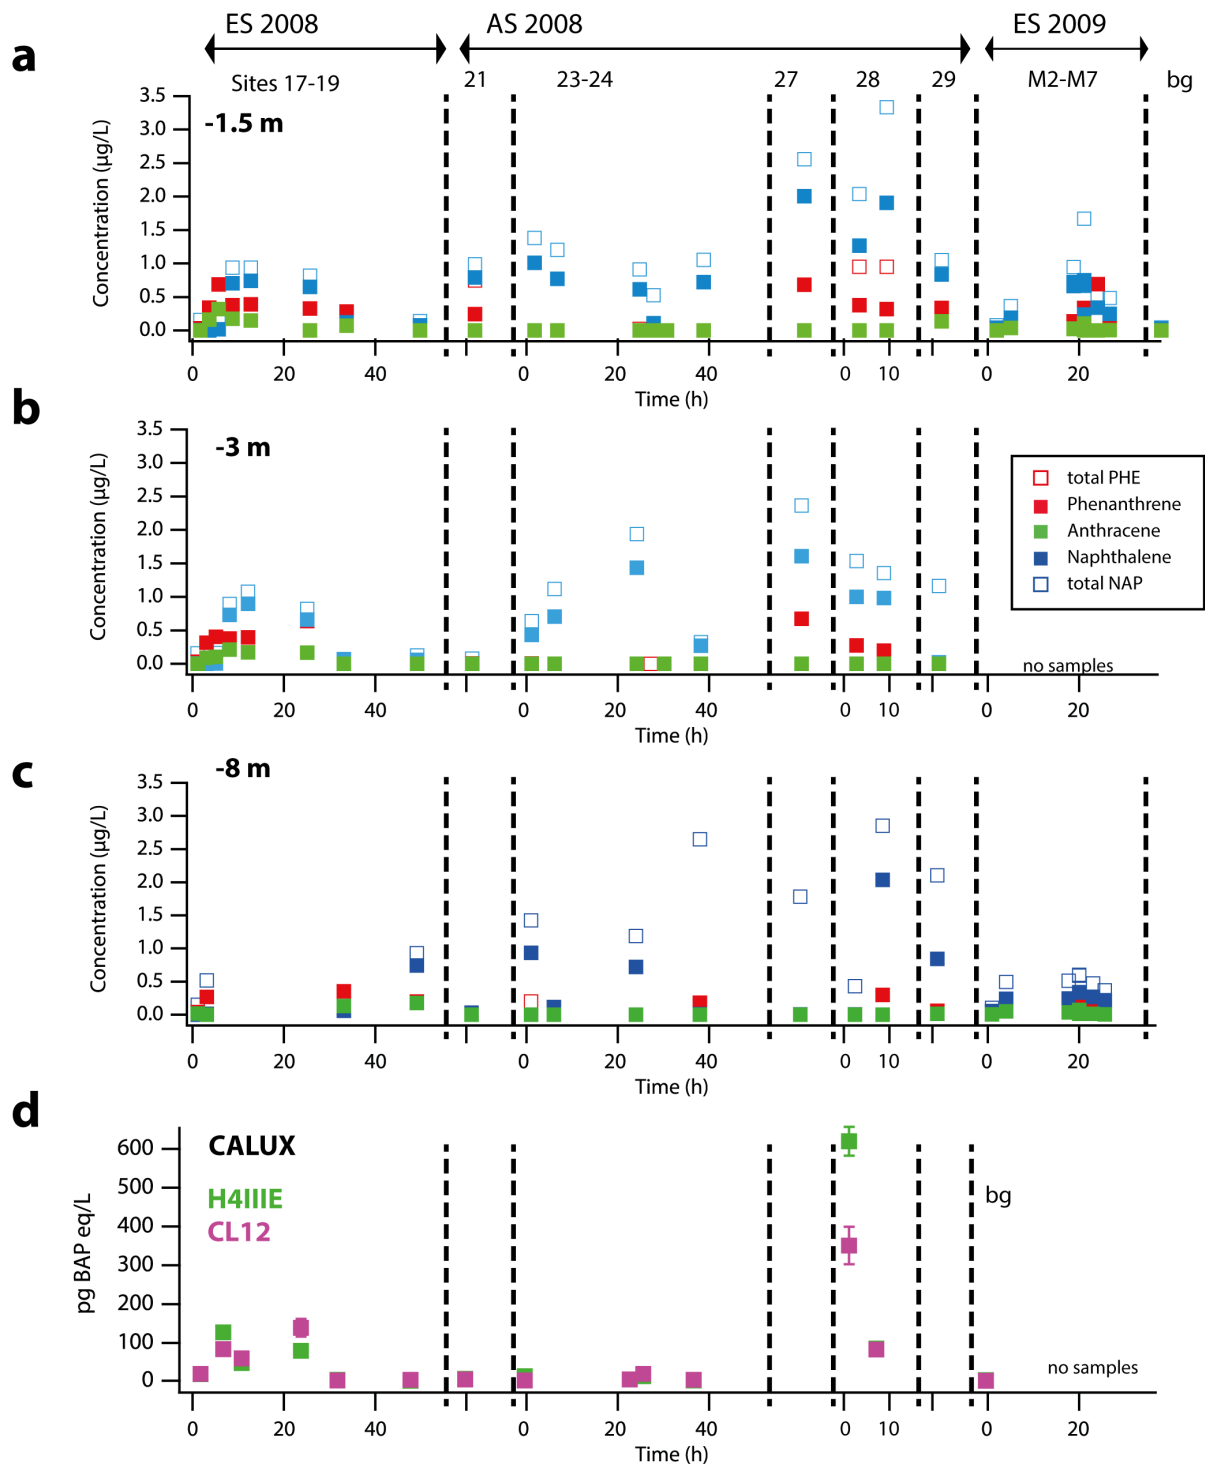

Supplementary Figure 4. Depth profiles of sum polycyclic aromatic hydrocarbons and CALUX toxicity tests across all open sea spills over time. For description of sampling points and sites, see Table S2 and Fig. 1.

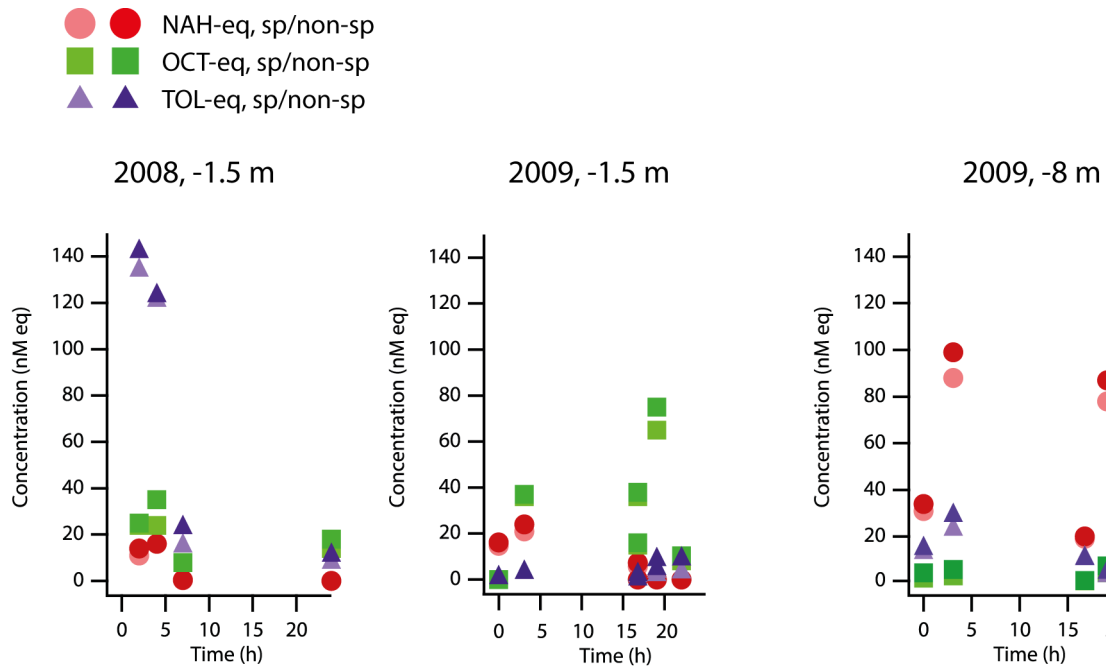

Supplementary Figure 5. Dissolution and weathering kinetics of the ES-2008 and ES-2009 spills analyzed on board with bioreporter assays. sp/non-sp, spiked /non-spiked samples.

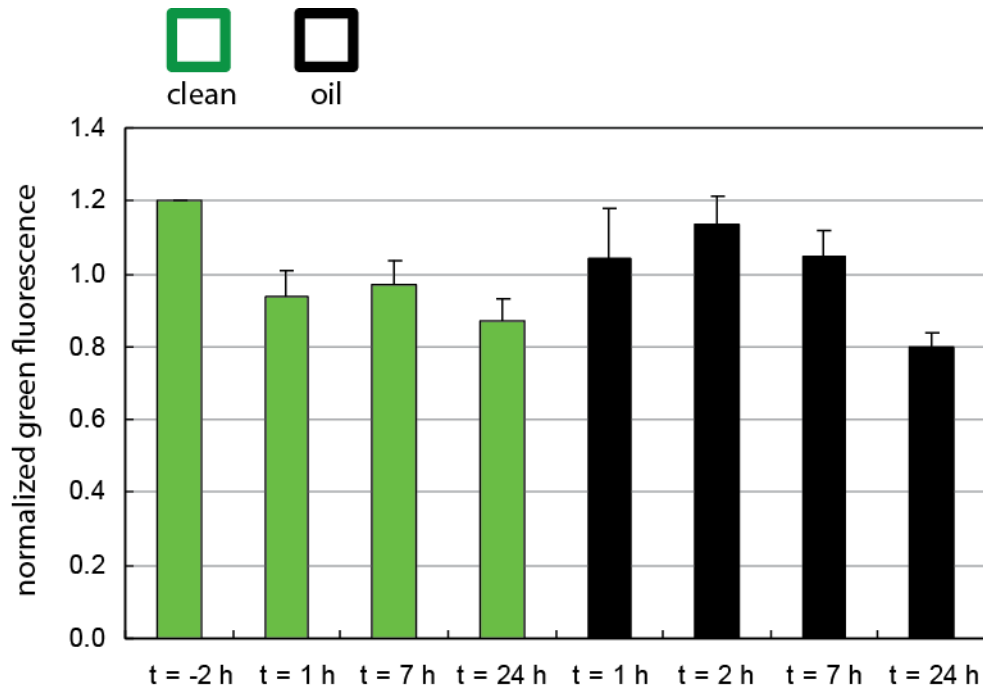

Supplementary Figure 6. *Micromonas pusilla* viability assay with samples derived from the ES-2008 spill (black bars) and with control samples from clean zones outside the spill (green bars). Values show normalized green fluorescence from cells exposed to seawater samples, compared to exposure in clean culture medium (=1). Bars are the average from the values of three depths at that sampling time point. Error bars indicate the difference between the minimum and maximum values. Time in h compared to spill release (t=0).

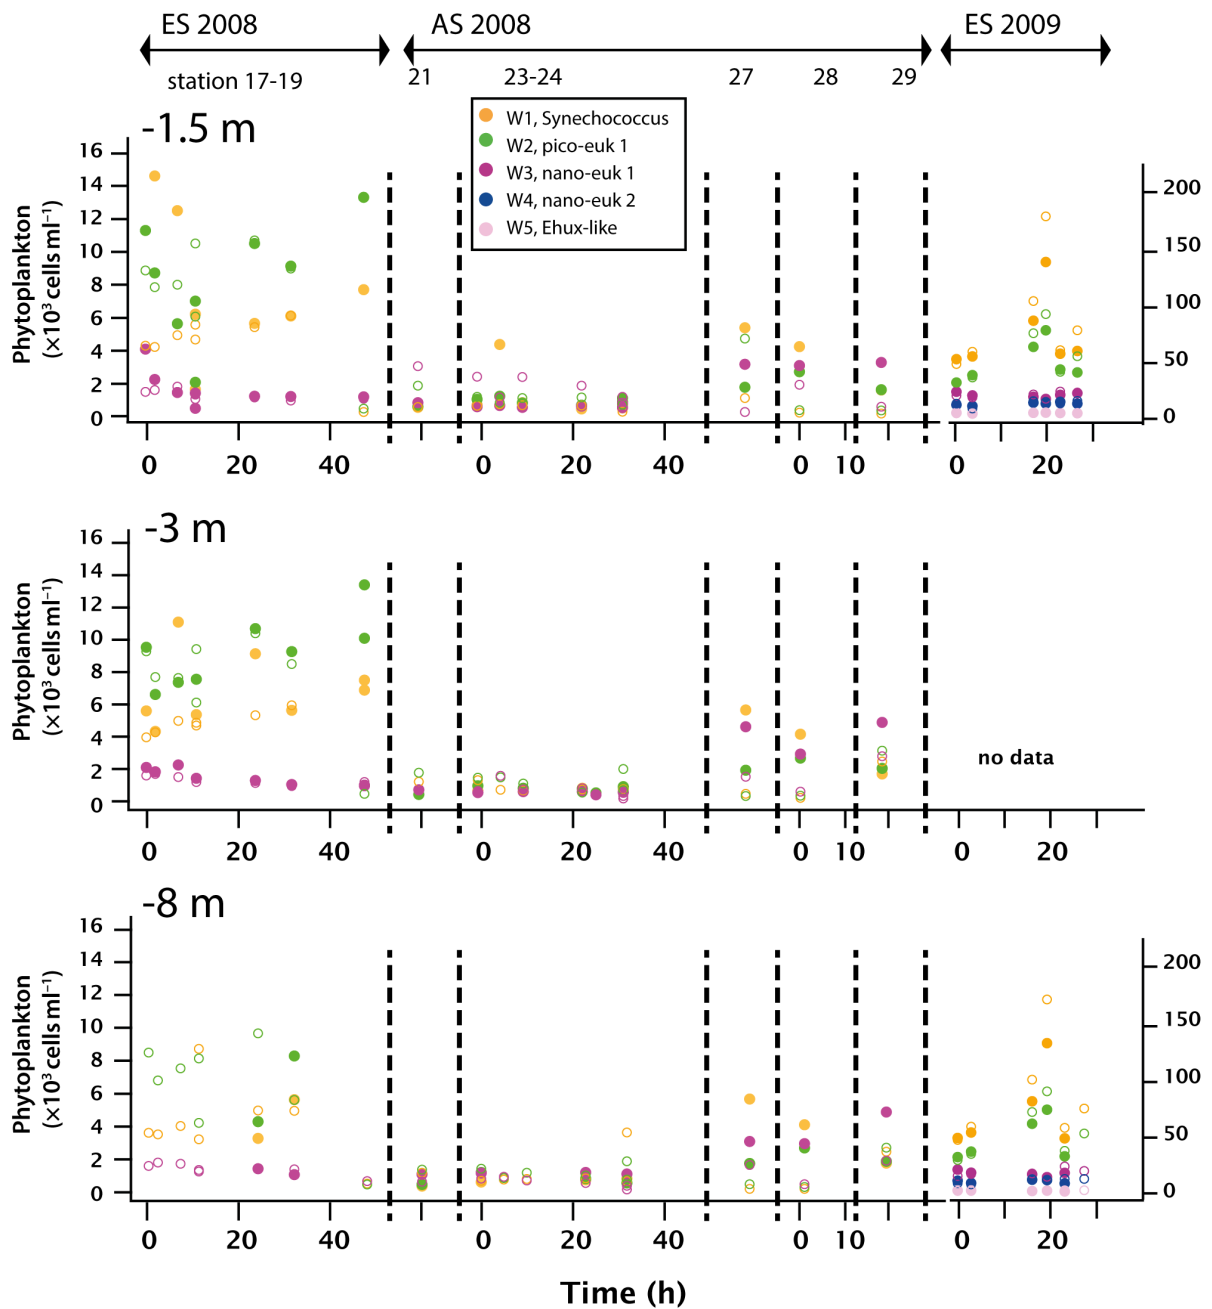

Supplementary Figure 7. Abundances of phytoplankton populations in seawater samples underneath (filled colors) and outside oil slicks (open circles), and at three different depths estimated by flow cytometry counting (1.5, 3 and 8 m below surface). Colors indicate different phytoplankton groups. ES-2008, experimental spill of 2008. AS 2008, encountered accidental spills in 2008. ES-2009, experimental spill of 2009. Note the different right-hand scale (y-axis) for counts in the ES-2009. For site description and locations, see Table S2 and Fig. 1.

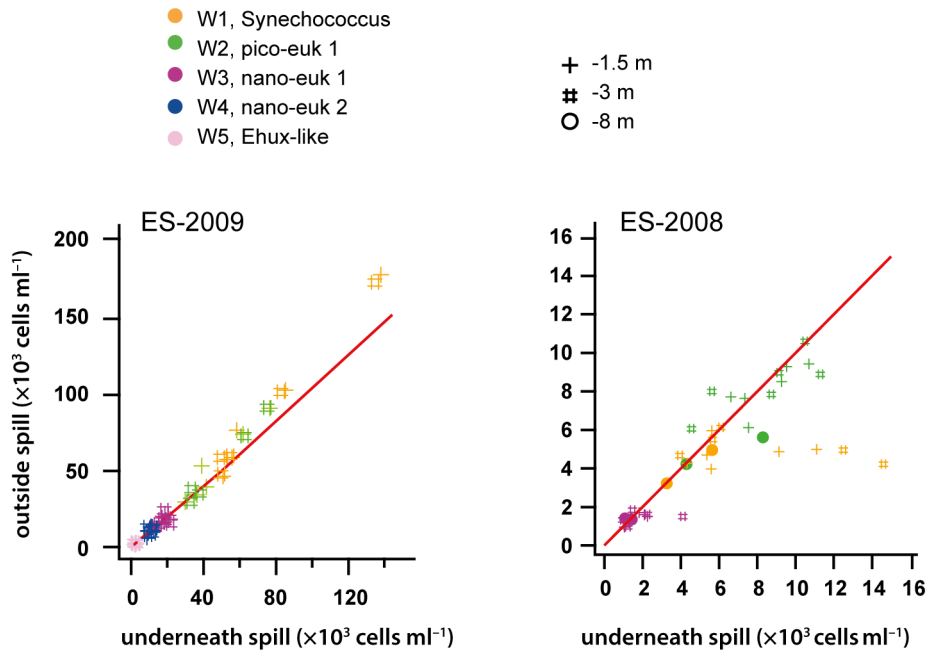

Supplementary Figure 8. Correlation between pair-wise plankton counts in seawater samples from below slicks with outside slicks sampled at similar time points. Different colors correspond to different phytoplankton groups. Different symbols correspond to different sampling depths. Note the difference in scale (phytoplankton abundance) between ES-2009 and ES-2008. The red line indicates the expected pair-wise abundance for identical counts below slicks and in clean seawater regions.

Abundances of total and picoeukaryotic phytoplankton in 2008 correlated well across all pair-wise (oil vs non-oil) samples, further supporting the interpretation that the oil did not affect total phytoplankton numbers ( $r^2 = 0.85-0.98$ ).



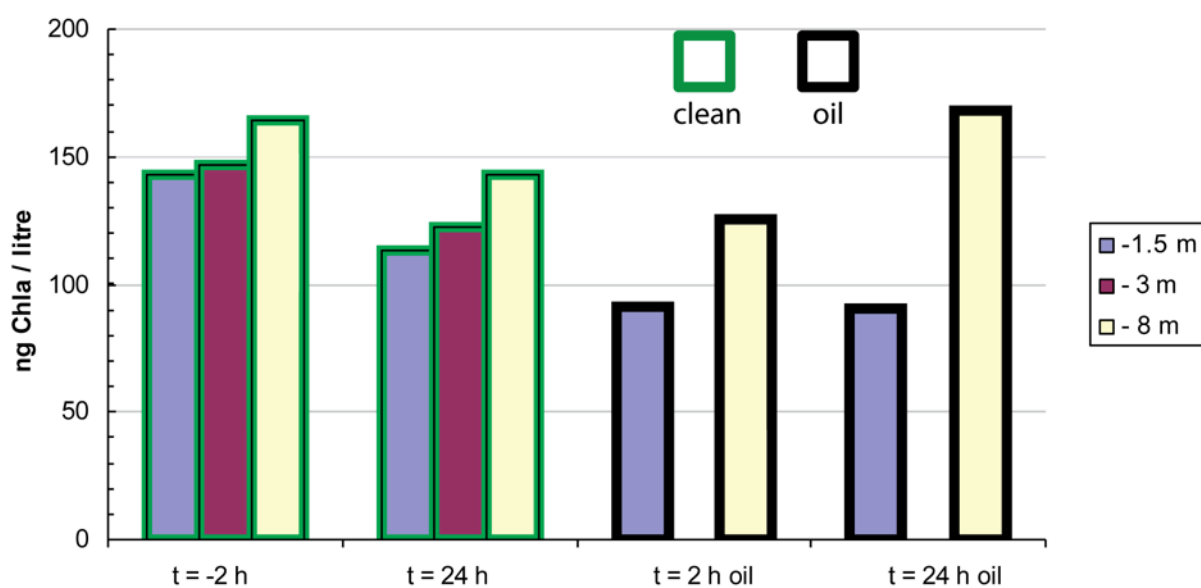

Supplementary Figure 9. Chlorophyll-a concentrations in samples from the ES-2008 spill (black outlines) and comparable outside-slick samples (green outlines), at three depths, as indicated. Values are not significantly different between oiled and non-oiled samples (t-test all oil/non-oil, two-tailed, unequal variance,  $P=0.27$ ; t-test all samples at -1.5 m oil/non-oil, one-tailed, unequal variance,  $P=0.064$ ).

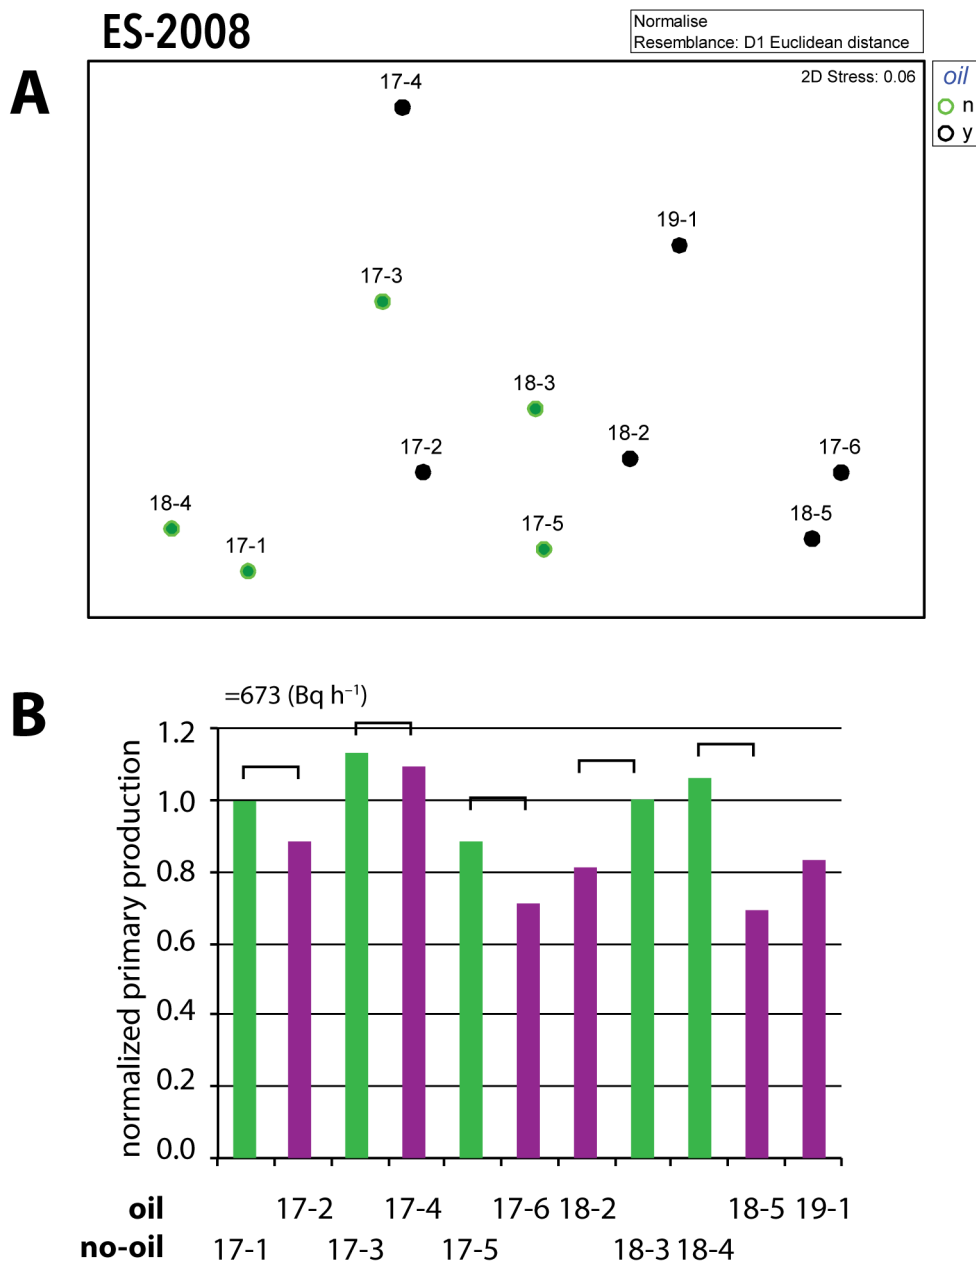

Supplementary Figure 10. Primary production in samples from the ES-2008 spill with oil (black) compared to outside-slick samples (green). (A) Multivariate analysis combining the four primary production curve variables  $P_{max}$ ,  $I_{max}$ ,  $s$  and  $w$  (ANOSIM, Euclidian distance,  $R = 0.26$ ,  $P < 0.05$ ). (B) Normalized primary production compared to 17-1 (= 673 Bq h<sup>-1</sup>). For sample and site indications, see Table S2. Samples taken at approximate similar time points grouped by clamps.

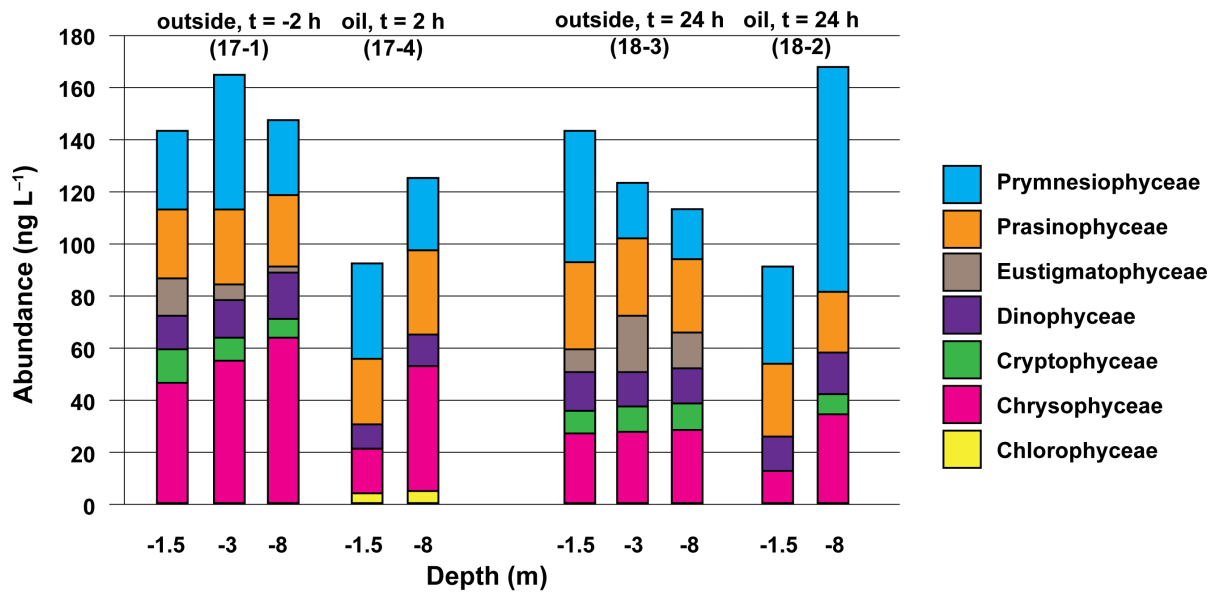

Supplementary Figure 11. Distribution of Phytoplankton families on the basis of photopigments in the ES-2008 spill among seawater samples from outside slick zones (sampling sites 17-1 and 18-3) versus underneath slick (17-4 and 18-2). Note the disappearance of Cryptophyceae and Eustigmatophyceae in oiled samples.

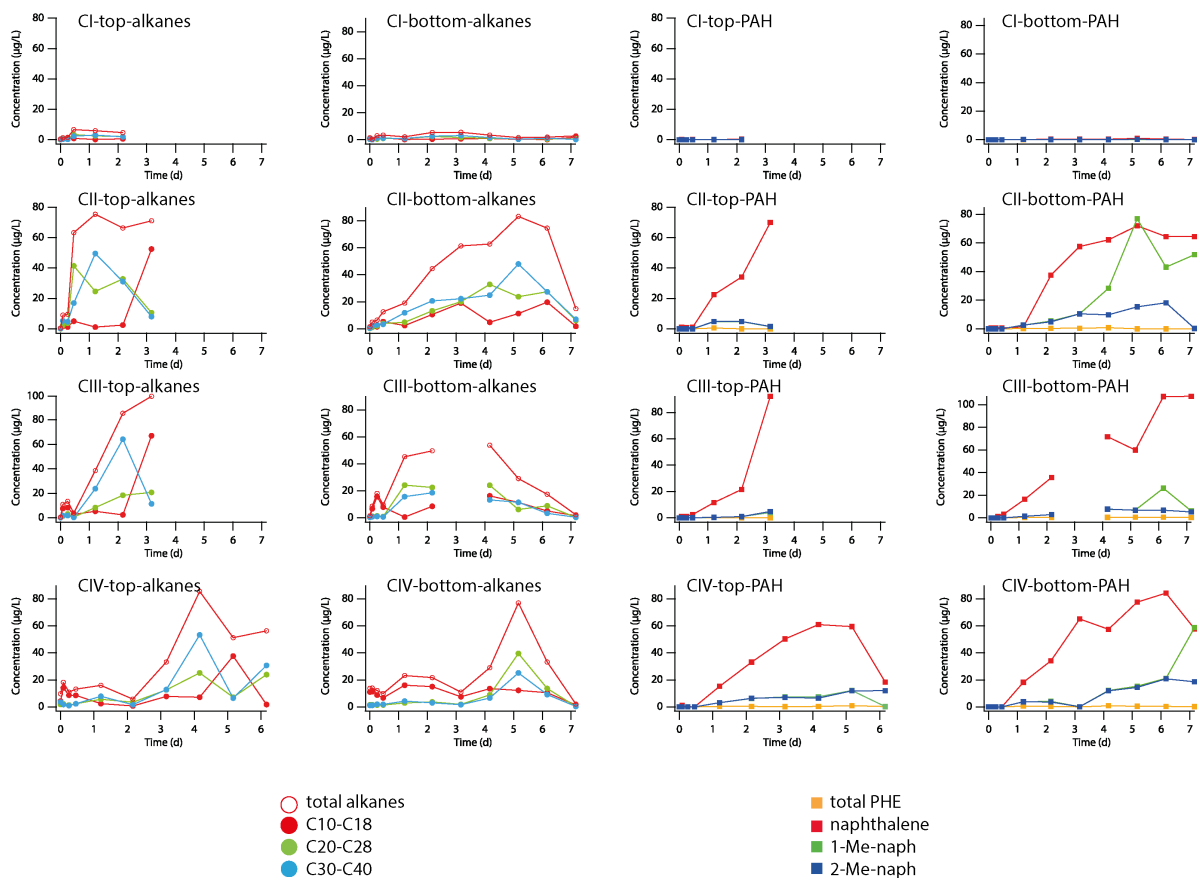

Supplementary Figure 12. Selected and sum parameter chemical data of mesocosm vessel samples over time.

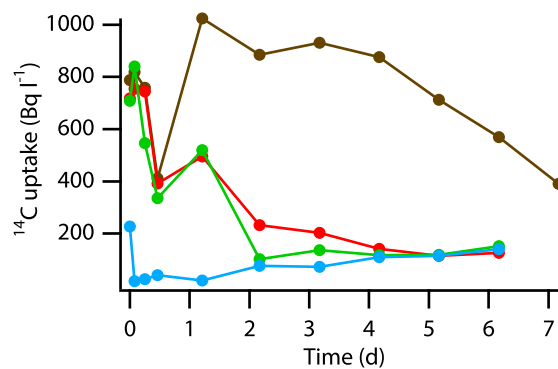

Supplementary Figure 13.  $^{14}\text{C}$ -bicarbonate uptake within 2 h incubation at  $72 \mu\text{mol photons m}^{-2} \text{s}^{-1}$  illumination for samples taken from the mesocosms at different time points. Brown, C-I (uncontaminated control); red, C-II (2 l crude oil); green, C-III (5 l crude oil); blue, C-IV (UV killed control but contaminated with 2 l crude oil).

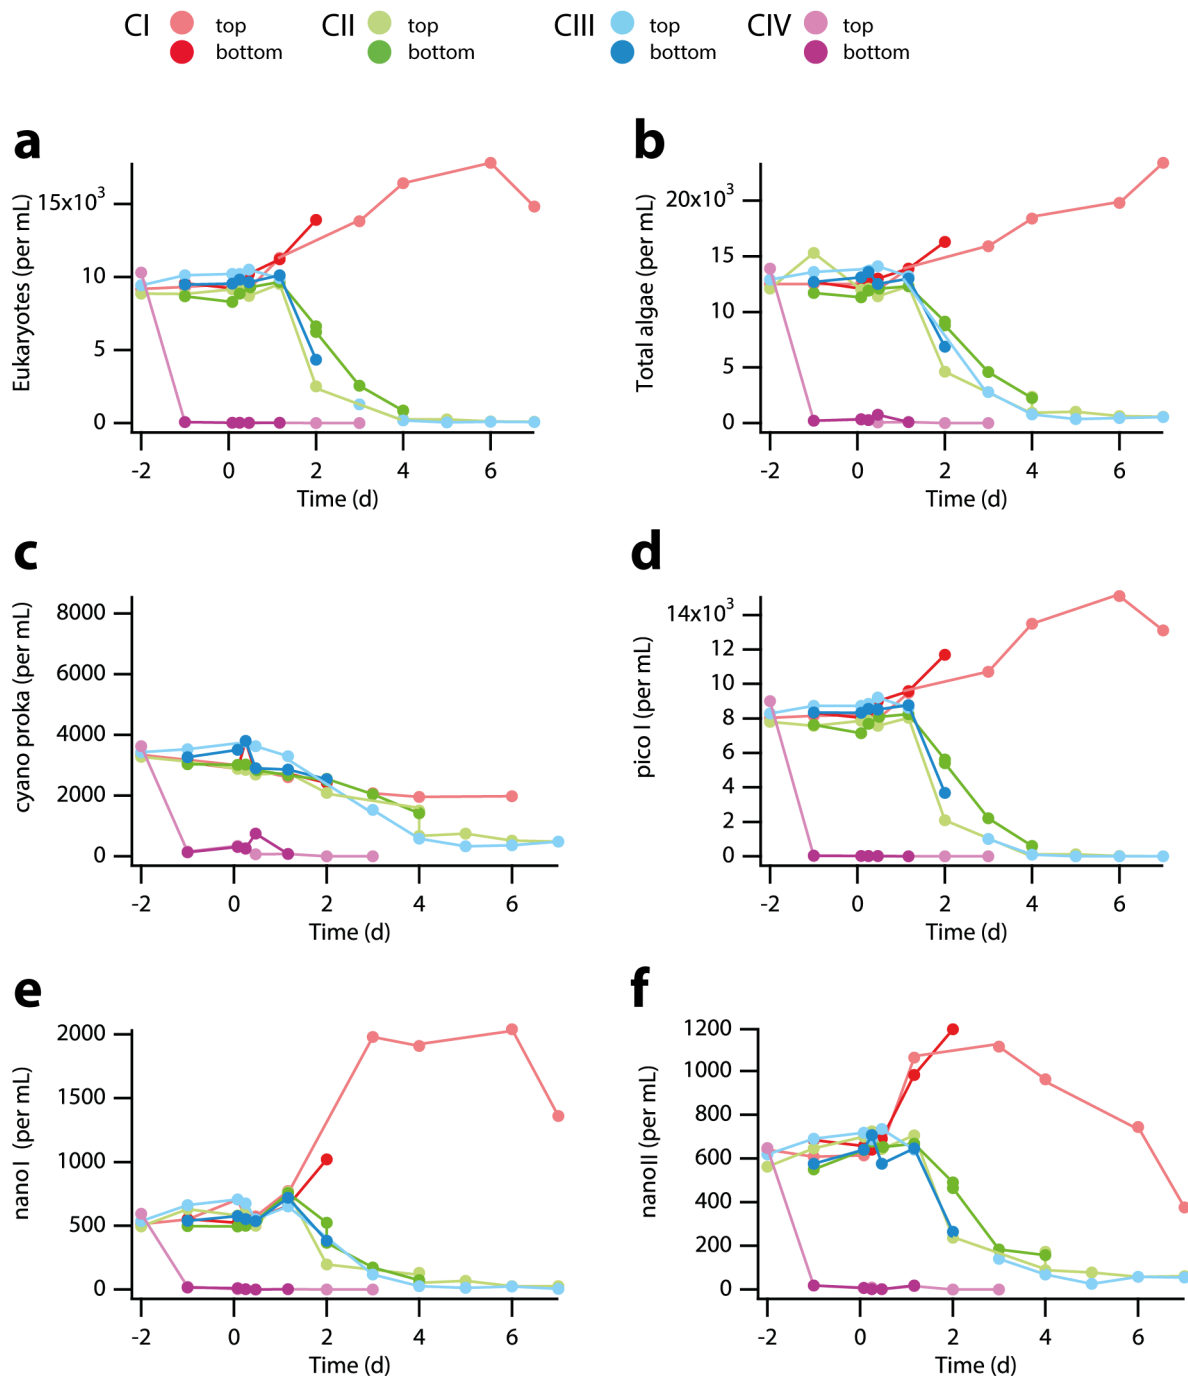

Supplementary Figure 14. Temporal phytoplankton abundance dynamics in the mesocosms. **a** Total phytoplankton counts. **b** Cyanobacteria (*Synechococcus* spp.). **c** Total eukaryotic phytoplankton. **d** Picoeukaryotic phytoplankton. **e** Nanoeukaryotic phytoplankton group I. **f** Nanoeukaryotic phytoplankton group II.

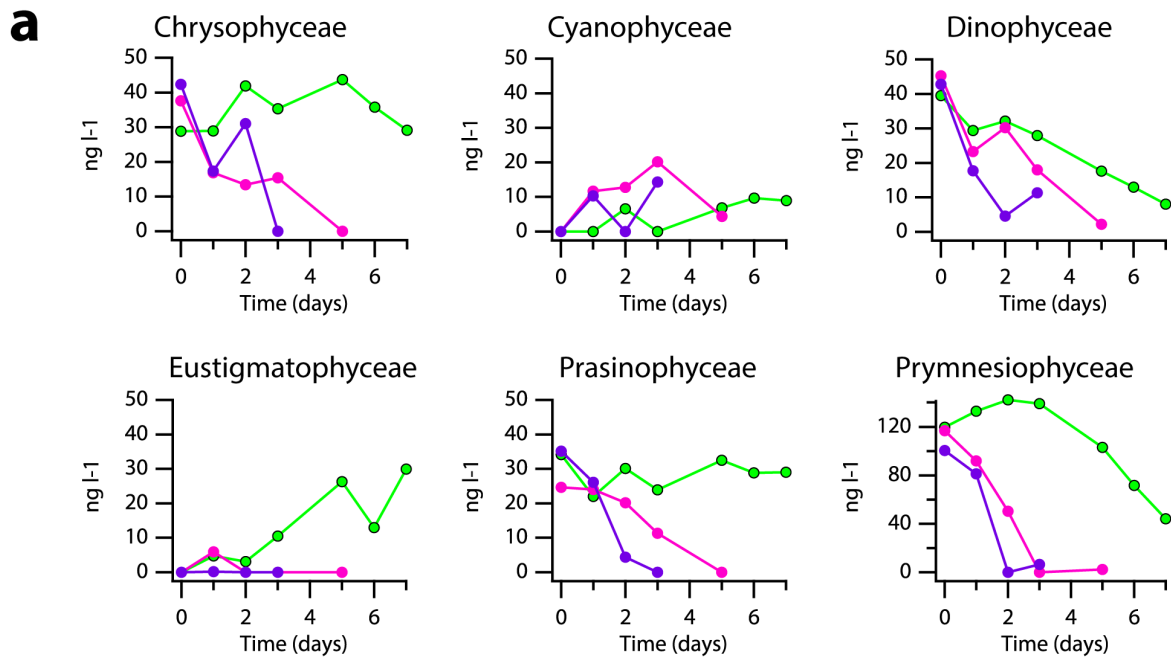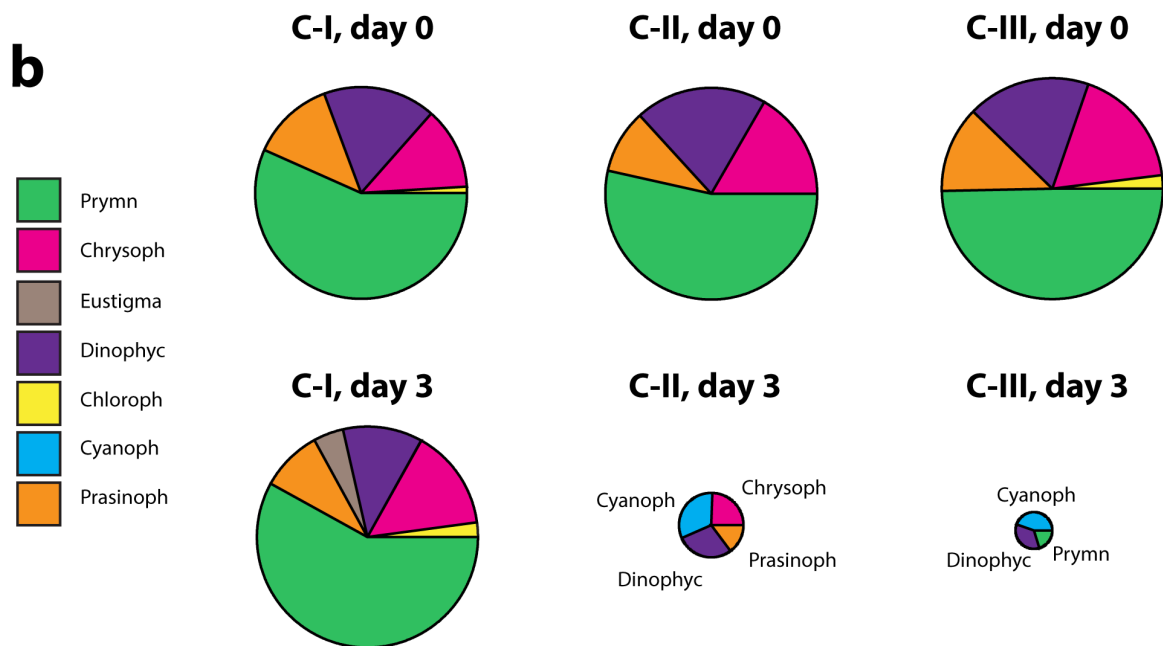

Supplementary Figure 15. Changes in major phytoplankton groups in samples from mesocosms determined by pigment analysis. **a** Changes over time in C-I (non-oiled, green), C-II (oiled, rose) and C-III (oiled, magenta). **b** Proportional composition at day 0 and day 3. Pie diameter proportional to total amount of pigment per ml sample. Note the disappearance of Chrysophyceae, Prymnesiophyceae and Prasinophyceae in oiled compared to non-oiled mesocosms.

Supplementary Table 1. Composition and basic properties of the crude oils used in the experimental spills.

| <b>Property<sup>a</sup></b>    | <b>Arabian light (ES2008)<sup>b</sup></b> | <b>Crane (ES2009)</b> |       |
|--------------------------------|-------------------------------------------|-----------------------|-------|
| API Gravity                    | 33.4                                      | 19.10                 | ° API |
| density                        | 0.8641                                    | 0.963                 | g/ml  |
|                                |                                           |                       |       |
| total BTEX                     | 10.9                                      | 1.24                  | mg/g  |
| total n-alkanes                | 84.6                                      | 8.26                  | mg/g  |
| total C8-C11 alkanes           | 28.7                                      | 0.65                  | mg/g  |
| naphthalene                    | 50.3                                      | 832                   | µg/g  |
| total methylated naphthalenes  | 3.9                                       | 4.9                   | mg/g  |
| phenanthrene                   | 51.2                                      | 338                   | µg/g  |
| total methylated phenanthrenes | 1.3                                       | 0.85                  | mg/g  |
| total<br>NAH,PHE,DBT,CHR,FLU   | 7.9                                       | 5.81                  | mg/g  |
| total other PAHs               | 37                                        | 220                   | µg/g  |

a) at 0% weathering and 15°C.

b) Reference <sup>1</sup>

c) Reference <sup>2</sup>

Supplementary Table 2. Overview of sampling sites and measurement types.

| Time (MET) and date     | Site designation   | Sample designation | Sampling time (h) | Position <sup>a</sup> | Depth (m) | Location of vessel     | Measurements |       |    |    |     |      |          |
|-------------------------|--------------------|--------------------|-------------------|-----------------------|-----------|------------------------|--------------|-------|----|----|-----|------|----------|
| <b>ES 2008</b>          |                    |                    |                   |                       |           |                        |              |       |    |    |     |      |          |
| 08.05.08, 09:20         | 17-19              | 17-1               | -2                | O                     | 1.5, 3, 8 | 54°17'N, 3°50'E        | Nu           | Chl-A | PI | PP | FDA | Chem | BB       |
|                         |                    | 17-2               | 0                 | I                     | 1.5, 3, 8 |                        | Nu           | Chl-A | PI | PP | FDA | Chem |          |
|                         |                    | 17-3               | 1                 | O                     | 1.5, 3, 8 |                        | Nu           | Chl-A | PI | PP | FDA | Chem |          |
| 11:20                   | 17-19              | 17-4               | 2                 | I                     | 1.5, 3, 8 | 54°17'N, 3°53'E        | Nu           | Chl-A | PI | PP | FDA | Chem | BB       |
|                         |                    | 17-5               | 7                 | O                     | 1.5, 3, 8 |                        | Nu           | Chl-A | PI | PP | FDA | Chem |          |
| 16:30                   | 17-19              | 17-6               | 7                 | I                     | 1.5, 3, 8 | 54°19'N, 3°52'E        | Nu           | Chl-A | PI | PP | FDA | Chem | BB CALUX |
|                         |                    | 17-7               | 11                | O                     | 1.5, 3, 8 |                        | Nu           | Chl-A | PI | PP | FDA | Chem |          |
| 20:00                   | 17-19              | 17-8               | 11                | I                     | 1.5, 3, 8 | 54°20'N, 3°40'E        | Nu           | Chl-A | PI | PP | FDA | Chem | BB CALUX |
|                         |                    | 18-1               | 23                | O                     | 1.5, 3, 8 |                        | Nu           | Chl-A | PI | PP | FDA | Chem |          |
|                         |                    | 18-2               | 24                | I                     | 1.5, 3, 8 |                        | Nu           | Chl-A | PI | PP | FDA | Chem |          |
| 09.05.2008, 09:30       | 17-19              | 18-3               | 24                | O                     | 1.5, 3, 8 | 54°22'N, 3°31'E        | Nu           | Chl-A | PI | PP | FDA | Chem | BB CALUX |
|                         |                    | 18-4               | 31                | O                     | 1.5, 3, 8 |                        | Nu           | Chl-A | PI | PP | FDA | Chem |          |
|                         |                    | 18-5               | 32                | I                     | 1.5, 3, 8 |                        | Nu           | Chl-A | PI | PP | FDA | Chem |          |
| 17:00                   | 17-19              | 18-5               | 32                | I                     | 1.5, 3, 8 | 54°25'N, 3°37'E        | Nu           | Chl-A | PI | PP | FDA | Chem | CALUX    |
| 10.05.2008, 08:45       | 17-19              | 19-1               | 48                | I                     | 1.5, 3, 8 | 54°29'N, 3°32'E        | Nu           | Chl-A | PI | PP | FDA | Chem | CALUX    |
| <b>ES 2009</b>          |                    |                    |                   |                       |           |                        |              |       |    |    |     |      |          |
| 29.09.09 14:10<br>15:35 | M2-M7              | M1                 | 0                 | O                     | 1.5, 8    | 54°09.822'N/3°30.308'E | Nu           | Chl-A | PI |    | FDA |      |          |
|                         |                    | M2                 | 1                 | O                     | 1.5, 8    | 54°09.432'N/3°31.026'E | Nu           | Chl-A | PI |    | FDA | Chem |          |
|                         |                    |                    | 2                 | I, E                  | 1.5, 8    |                        | Nu           | Chl-A | PI |    | FDA | Chem | BB       |
| 18:42                   | M3                 |                    | 4                 | O                     | 1.5, 8    |                        | Nu           | Chl-A | PI |    | FDA |      |          |
|                         |                    |                    | 5                 | I, E                  | 1.5, 8    |                        | Nu           | Chl-A | PI |    | FDA | Chem | BB       |
| 30.09.09 08:27          | M4                 |                    | 18                | O                     | 1.5, 8    | 54°10.413'N/3°32.055'E | Nu           | Chl-A | PI |    | FDA |      |          |
|                         |                    |                    | 19                | I, E                  | 1.5, 8    |                        | Nu           | Chl-A | PI |    | FDA | Chem | BB       |
| 10:41                   | M5                 |                    | 20                | O                     | 1.5, 8    | 54°08.861'N/3°29.967'E | Nu           | Chl-A | PI |    | FDA |      |          |
|                         |                    |                    | 21                | I, E                  | 1.5, 8    |                        | Nu           | Chl-A | PI |    | FDA | Chem | BB       |
| 13:40                   | M6                 |                    | 23                | O                     | 1.5, 8    | 54°08.861'N/3°28.967'E | Nu           | Chl-A | PI |    | FDA |      |          |
|                         |                    |                    | 24                | I                     | 1.5, 8    |                        | Nu           | Chl-A | PI |    | FDA | Chem | BB       |
| 16:20                   | M7                 |                    | 26                | O, I                  | 1.5, 8    | 54°08.803'N/3°31.393'E | Nu           | Chl-A | PI |    | FDA |      |          |
| <b>AS 2008</b>          |                    |                    |                   |                       |           |                        |              |       |    |    |     |      |          |
| 10.05.08 20:05          | 21 <sup>b</sup>    | 21-1               | 1*                | I                     | 1.5       | 53.83153 N, 3.97798 E  | Nu           | Chl-A | PI | PP | FDA | Chem | BB CALUX |
| 11.05.08 10:00          | 23-24 <sup>c</sup> | 23-1               | 1*                | O, I                  | 1.5       | 53°45'N, 4°1'E         | Nu           | Chl-A | PI | PP | FDA | Chem | BB CALUX |
|                         |                    | 23-3               | 6                 | O, I                  | 1.5       |                        | Nu           | Chl-A | PI | PP | FDA | Chem | BB       |
|                         |                    | 23-4               | 11                | O, I                  | 1.5       |                        | Nu           | Chl-A | PI | PP | FDA |      | BB       |
|                         |                    | 24-1               | 24                | O, I                  | 1.5       | 53.79067 N, 4.12058 E  | Nu           | Chl-A | PI | PP | FDA | Chem | BB CALUX |
|                         |                    | 24-2               |                   | O, I                  | 1.5       |                        | Nu           | Chl-A | PI | PP | FDA | Chem | CALUX    |
| 14.05.08 08:00          | 27 <sup>d</sup>    | 24-4               | 30                | O, I                  | 1.5       |                        | Nu           | Chl-A | PI | PP | FDA | Chem | BB CALUX |
|                         |                    | 27-1               | 1*                | O                     | 1.5       | 53.50843 N, 3.96498 E  | Nu           | Chl-A | PI | PP | FDA | Chem |          |
| 14.05.08 10:30          | 28 <sup>e</sup>    | 28-1               | 1*                | I                     | 1.5       | 53.4065 N, 3.663 E     | Nu           | Chl-A | PI | PP | FDA | Chem | BB CALUX |
|                         |                    | 28-2               | 2.5               | O                     | 1.5       | 53.41993 N, 3.61137 E  | Nu           | Chl-A | PI | PP | FDA | Chem |          |



|                     |                        |        |     |         |     |                       |    |       |    |    |     |      |    |       |
|---------------------|------------------------|--------|-----|---------|-----|-----------------------|----|-------|----|----|-----|------|----|-------|
| 14.05.08 15:30      | <u>29</u> <sup>d</sup> | 29-1   | 1*  | O       | 1.5 | 53.57586 N, 3.89585 E | Nu | Chl-A | PI | PP | FDA | Chem |    |       |
| <b>Cube vessels</b> |                        |        |     |         |     |                       |    |       |    |    |     |      |    |       |
|                     |                        | CI-CIV | -2  | b, t, m | na  | na                    | Nu | Chl-A | PI | PP | FDA | Chem |    |       |
| 07.05.08 09:45      |                        | CI-CIV | 0   | b, t, m | na  |                       | Nu | Chl-A | PI | PP | FDA | Chem |    |       |
|                     |                        | CI-CIV | 2   | b, t, m | na  |                       | Nu | Chl-A | PI | PP | FDA | Chem |    | CALUX |
|                     |                        | CI-CIV | 6   | b, t, m | na  |                       | Nu | Chl-A | PI | PP | FDA | Chem | BB | CALUX |
|                     |                        | CI-CIV | 12  | b, t, m | na  |                       | Nu | Chl-A | PI | PP | FDA | Chem |    | CALUX |
|                     |                        | CI-CIV | 24  | b, t, m | na  |                       | Nu | Chl-A | PI | PP | FDA | Chem | BB | CALUX |
|                     |                        | CI-CIV | 48  | b, t, m | na  |                       | Nu | Chl-A | PI | PP | FDA | Chem | BB | CALUX |
|                     |                        | CI-CIV | 72  | b, t, m | na  |                       | Nu | Chl-A | PI | PP | FDA | Chem | BB | CALUX |
|                     |                        | CI-CIV | 96  | b, t, m | na  |                       | Nu | Chl-A | PI | PP | FDA | Chem | BB | CALUX |
|                     |                        | CI-CIV | 120 | b, m    | na  |                       | Nu | Chl-A | PI | PP | FDA | Chem | BB | CALUX |
|                     |                        | CI-CIV | 144 | b, m    | na  |                       | Nu | Chl-A | PI | PP | FDA | Chem |    | CALUX |
|                     |                        | CI-CIV | 168 | b, m    | na  |                       | Nu | Chl-A | PI | PP | FDA | Chem | BB | CALUX |

\*) relative timing compared to first sample taken at that site.

a) O, outside visible slick; I, inside; E, edge of slick.

b) Philippe Patch - (Length 1 mile / direction 065 degr.)

c) Cornelis Patch - (Length 4 miles / direction 030 degr.)

d) no visible oil slick

e) Flipje Patch - (length 300 m width 30 m / direction nno-ssw)

Supplementary Table 3. Hydrocarbon analysis of seawater samples in the ES-2008 and accidental spills of the 2008 campaign.

| Compound                 | Concentration (µg/L) in sample |          |          |          |          |          |          |          |          |             |          |          |          |          |          |          |          |          |          |
|--------------------------|--------------------------------|----------|----------|----------|----------|----------|----------|----------|----------|-------------|----------|----------|----------|----------|----------|----------|----------|----------|----------|
|                          | start                          | 17-2 top | 17-4 top | 17-6 top | 17-8 top | 18-2 top | 18-5 top | 19-1 top | 21-1 top | 23-1 top    | 23-3 top | 24-1 top | 24-2 top | 24-3 top | 24-5 top | 27-1 top | 28-1 top | 28-2 top | 29-1 top |
| <b>Depth -1.5 m</b>      |                                |          |          |          |          |          |          |          |          |             |          |          |          |          |          |          |          |          |          |
| Naphthalene              | 0.004                          | 0.002    | 0.016    | 0.705    | 0.740    | 0.652    | 0.120    | 0.075    | 0.790    | 1.011       | 0.770    | 0.613    | 0.106    | 0.000    | 0.720    | 2.005    | 1.265    | 1.907    | 0.835    |
| Acenaphthylene           | 0.000                          | 0.000    | 0.000    | 0.153    | 0.000    | 0.000    | 0.000    | 0.000    | 0.000    | 0.000       | 0.000    | 0.000    | 0.000    | 0.000    | 0.000    | 0.000    | 0.000    | 0.000    | 0.000    |
| Acenaphthene             | 0.000                          | 0.000    | 0.000    | 0.000    | 0.082    | 0.023    | 0.013    | 0.000    | 0.001    | 0.000       | 0.000    | 0.000    | 0.000    | 0.000    | 0.000    | 0.000    | 0.000    | 0.000    | 0.001    |
| Fluorene                 | 0.016                          | 0.000    | 0.000    | 0.178    | 0.000    | 0.000    | 0.000    | 0.000    | 0.000    | 0.000       | 0.000    | 0.000    | 0.000    | 0.000    | 0.000    | 0.000    | 0.000    | 0.000    | 0.000    |
| Phenanthrene             | 0.032                          | 0.340    | 0.684    | 0.375    | 0.391    | 0.326    | 0.281    | 0.000    | 0.243    | 0.000       | 0.000    | 0.000    | 0.000    | 0.000    | 0.000    | 0.683    | 0.375    | 0.321    | 0.338    |
| Anthracene               | 0.001                          | 0.163    | 0.321    | 0.174    | 0.146    | 0.000    | 0.073    | 0.000    | 0.001    | 0.000       | 0.000    | 0.000    | 0.000    | 0.000    | 0.000    | 0.000    | 0.000    | 0.000    | 0.135    |
| Fluoranthene             | 0.000                          | 0.000    | 0.000    | 0.000    | 0.000    | 0.000    | 0.000    | 0.000    | 0.000    | 0.000       | 0.000    | 0.000    | 0.000    | 0.000    | 0.000    | 0.000    | 0.000    | 0.000    | 0.000    |
| Pyrene                   | 0.000                          | 0.000    | 0.000    | 0.000    | 0.000    | 0.000    | 0.000    | 0.000    | 0.000    | 0.000       | 0.000    | 0.000    | 0.000    | 0.000    | 0.000    | 0.000    | 0.000    | 0.000    | 0.000    |
| Chrysene                 | 0.000                          | 0.000    | 0.000    | 0.000    | 0.000    | 0.000    | 0.000    | 0.000    | 0.000    | 0.000       | 0.000    | 0.000    | 0.000    | 0.000    | 0.000    | 0.000    | 0.000    | 0.000    | 0.000    |
| Benzo(a)anthracene       | 0.000                          | 0.000    | 0.000    | 0.000    | 0.000    | 0.000    | 0.000    | 0.000    | 0.000    | 0.000       | 0.000    | 0.000    | 0.000    | 0.000    | 0.000    | 0.000    | 0.000    | 0.000    | 0.000    |
| Benzo(b)fluoranthene     | 0.000                          | 0.000    | 0.000    | 0.000    | 0.000    | 0.000    | 0.000    | 0.000    | 0.000    | 0.000       | 0.000    | 0.000    | 0.000    | 0.000    | 0.000    | 0.000    | 0.000    | 0.000    | 0.000    |
| Benzo(k)fluoranthene     | 0.000                          | 0.000    | 0.000    | 0.000    | 0.000    | 0.000    | 0.000    | 0.000    | 0.000    | 0.000       | 0.000    | 0.000    | 0.000    | 0.000    | 0.000    | 0.000    | 0.000    | 0.000    | 0.000    |
| Benzo(a)pyrene           | 0.000                          | 0.000    | 0.000    | 0.000    | 0.000    | 0.000    | 0.000    | 0.000    | 0.000    | 0.000       | 0.000    | 0.000    | 0.000    | 0.000    | 0.000    | 0.000    | 0.000    | 0.000    | 0.000    |
| Indeno(123-cd)pyrene     | 0.000                          | 0.000    | 0.000    | 0.000    | 0.000    | 0.000    | 0.000    | 0.000    | 0.000    | 0.000       | 0.000    | 0.000    | 0.000    | 0.000    | 0.000    | 0.000    | 0.000    | 0.000    | 0.000    |
| Dibenzo(ah)anthracene    | 0.000                          | 0.000    | 0.000    | 0.000    | 0.000    | 0.000    | 0.000    | 0.000    | 0.000    | 0.000       | 0.000    | 0.000    | 0.000    | 0.000    | 0.000    | 0.000    | 0.000    | 0.000    | 0.000    |
| Benzo(ghi)perylene       | 0.000                          | 0.000    | 0.000    | 0.000    | 0.000    | 0.000    | 0.000    | 0.000    | 0.000    | 0.000       | 0.000    | 0.000    | 0.000    | 0.000    | 0.000    | 0.000    | 0.000    | 0.000    | 0.000    |
| 2-Methylnaphthalene      | 0.070                          | 0.107    | 0.085    | 0.111    | 0.101    | 0.070    | 0.070    | 0.023    | 0.097    | 0.132       | 0.149    | 0.126    | 0.145    | 0.001    | 0.104    | 0.182    | 0.285    | 0.584    | 0.104    |
| 1-Methylnaphthalene      | 0.077                          | 0.107    | 0.085    | 0.122    | 0.099    | 0.093    | 0.058    | 0.025    | 0.098    | 0.188       | 0.168    | 0.158    | 0.143    | 0.001    | 0.115    | 0.225    | 0.298    | 0.480    | 0.109    |
| 2,6-Dimethylnaphthalene  | 0.003                          | 0.000    | 0.000    | 0.000    | 0.000    | 0.000    | 0.000    | 0.005    | 0.000    | 0.051       | 0.039    | 0.013    | 0.047    | 0.000    | 0.034    | 0.050    | 0.073    | 0.150    | 0.000    |
| 1,6-Dimethylnaphthalene  | 0.004                          | 0.000    | 0.000    | 0.000    | 0.000    | 0.000    | 0.000    | 0.011    | 0.000    | 0.000       | 0.079    | 0.000    | 0.086    | 0.000    | 0.081    | 0.095    | 0.117    | 0.212    | 0.000    |
| 1,2-Dimethylnaphthalene  | 0.000                          | 0.000    | 0.000    | 0.000    | 0.000    | 0.000    | 0.000    | 0.000    | 0.000    | 0.000       | 0.000    | 0.000    | 0.000    | 0.000    | 0.000    | 0.000    | 0.000    | 0.000    | 0.000    |
| 3-Methylantracene        | 0.000                          | 0.000    | 0.000    | 0.000    | 0.000    | 0.000    | 0.000    | 0.000    | 0.000    | 0.000       | 0.000    | 0.000    | 0.000    | 0.000    | 0.000    | 0.000    | 0.000    | 0.000    | 0.000    |
| 3-Methylphenanthrene     | 0.000                          | 0.000    | 0.000    | 0.000    | 0.000    | 0.000    | 0.000    | 0.000    | 0.000    | 0.000       | 0.000    | 0.000    | 0.000    | 0.000    | 0.000    | 0.000    | 0.000    | 0.000    | 0.000    |
| 2-Methylphenanthrene     | 0.000                          | 0.000    | 0.000    | 0.000    | 0.000    | 0.000    | 0.000    | 0.000    | 0.000    | 0.000       | 0.000    | 0.000    | 0.000    | 0.000    | 0.000    | 0.000    | 0.000    | 0.000    | 0.000    |
| 9-Methylphenanthrene     | 0.000                          | 0.000    | 0.000    | 0.000    | 0.000    | 0.000    | 0.000    | 0.000    | 0.000    | 0.000       | 0.000    | 0.000    | 0.000    | 0.000    | 0.000    | 0.000    | 0.000    | 0.000    | 0.000    |
| 1-Methylphenanthrene     | 0.000                          | 0.000    | 0.000    | 0.000    | 0.000    | 0.000    | 0.000    | 0.000    | 0.000    | 0.000       | 0.000    | 0.000    | 0.000    | 0.000    | 0.000    | 0.000    | 0.000    | 0.000    | 0.000    |
| 1,7-Dimethylphenanthrene | 0.000                          | 0.000    | 0.000    | 0.000    | 0.000    | 0.000    | 0.000    | 0.000    | 0.502    | 0.000       | 0.000    | 0.020    | 0.000    | 0.000    | 0.000    | 0.000    | 0.575    | 0.629    | 0.000    |
| 1+3-Methylfluoranthene   | 0.000                          | 0.000    | 0.000    | 0.000    | 0.000    | 0.000    | 0.000    | 0.000    | 0.000    | 0.000       | 0.000    | 0.000    | 0.000    | 0.000    | 0.000    | 0.000    | 0.000    | 0.000    | 0.000    |
| Retene                   | 0.000                          | 0.000    | 0.000    | 0.000    | 0.000    | 0.000    | 0.000    | 0.000    | 0.000    | 0.000       | 0.000    | 0.000    | 0.000    | 0.000    | 0.000    | 0.000    | 0.000    | 0.000    | 0.000    |
| 3-Methylpyrene           | 0.000                          | 0.000    | 0.000    | 0.000    | 0.000    | 0.000    | 0.000    | 0.000    | 0.000    | 0.000       | 0.000    | 0.000    | 0.000    | 0.000    | 0.000    | 0.000    | 0.000    | 0.000    | 0.000    |
| 1-Methylpyrene           | 0.000                          | 0.000    | 0.000    | 0.000    | 0.000    | 0.000    | 0.000    | 0.000    | 0.000    | 0.000       | 0.000    | 0.000    | 0.000    | 0.000    | 0.000    | 0.000    | 0.000    | 0.000    | 0.000    |
| 3-Methylchrysene         | 0.000                          | 0.000    | 0.000    | 0.000    | 0.000    | 0.000    | 0.000    | 0.000    | 0.000    | 0.000       | 0.000    | 0.000    | 0.000    | 0.000    | 0.000    | 0.000    | 0.000    | 0.000    | 0.000    |
| 6-Methylchrysene         | 0.000                          | 0.000    | 0.000    | 0.000    | 0.000    | 0.000    | 0.000    | 0.000    | 0.000    | 0.000       | 0.000    | 0.000    | 0.000    | 0.000    | 0.000    | 0.000    | 0.000    | 0.000    | 0.000    |
|                          |                                |          |          |          |          |          |          |          |          | ohne filter |          |          |          |          |          |          |          |          |          |
| n-Decane                 | 0.026                          | 0.082    | 2.150    | 1.227    | 0.274    | 0.368    | 0.089    | 5.894    | 0.649    | 0.002       | 0.000    | 0.199    | 0.008    | 0.000    | 2.277    | 2.462    | 0.000    | 0.000    | 0.486    |
| n-Dodecane               | 0.060                          | 1.621    | 8.424    | 2.637    | 2.888    | 2.990    | 0.332    | 0.004    | 0.764    | 0.036       | 0.784    | 2.018    | 0.472    | 0.018    | 1.588    | 0.157    | 0.652    | 0.572    | 2.738    |
| n-Tetradecane            | 0.042                          | 1.193    | 2.959    | 3.134    | 3.929    | 7.841    | 0.239    | 2.500    | 1.781    | 0.075       | 1.941    | 18.689   | 2.527    | 0.060    | 3.392    | 0.470    | 3.712    | 2.811    | 6.517    |

|                          |              |                 |                 |                 |                 |                 |                 |                 |                 |                 |                 |                 |                 |                 |                 |                 |                 |                 |                 |
|--------------------------|--------------|-----------------|-----------------|-----------------|-----------------|-----------------|-----------------|-----------------|-----------------|-----------------|-----------------|-----------------|-----------------|-----------------|-----------------|-----------------|-----------------|-----------------|-----------------|
| n-Hexadecane             | 0.196        | 0.337           | 0.355           | 0.943           | 1.124           | 0.087           | 0.027           | 0.250           | 0.186           | 0.000           | 0.000           | 0.957           | 0.004           | 0.013           | 0.016           | 0.043           | 0.509           | 0.433           | 0.164           |
| n-Heptadecane            | 0.185        | 0.117           | 0.104           | 0.504           | 0.742           | 0.675           | 0.031           | 0.000           | 0.011           | 0.002           | 0.000           | 0.000           | 0.000           | 0.000           | 0.000           | 0.000           | 0.000           | 0.000           | 1.250           |
| Pristane                 | 0.025        | 0.119           | 0.125           | 0.495           | 0.702           | 0.677           | 0.020           | 0.000           | 0.003           | 0.002           | 0.000           | 0.000           | 0.000           | 0.000           | 0.000           | 0.000           | 0.000           | 0.000           | 1.366           |
| n-Octadecane             | 0.026        | 0.120           | 0.193           | 0.525           | 0.691           | 0.427           | 0.044           | 0.000           | 1.606           | 0.002           | 0.000           | 0.000           | 0.000           | 0.000           | 0.000           | 0.000           | 0.000           | 0.000           | 0.576           |
| Phytane                  | 0.026        | 0.125           | 0.177           | 0.244           | 0.652           | 0.428           | 0.025           | 0.000           | 0.011           | 0.002           | 0.000           | 0.206           | 0.000           | 0.000           | 0.000           | 0.000           | 0.000           | 0.000           | 0.580           |
| n-Eicosane               | 0.249        | 0.206           | 0.360           | 0.235           | 0.256           | 0.206           | 0.102           | 0.000           | 0.004           | 0.001           | 0.000           | 0.201           | 0.003           | 0.009           | 0.006           | 0.000           | 0.000           | 0.320           | 0.374           |
| n-Docosane               | 0.077        | 0.079           | 1.487           | 0.343           | 0.831           | 0.459           | 0.253           | 0.163           | 0.218           | 0.007           | 0.015           | 1.078           | 0.051           | 0.050           | 0.064           | 0.010           | 0.403           | 1.158           | 0.160           |
| n-Tetracosane            | 0.664        | 0.287           | 4.010           | 1.618           | 5.311           | 1.236           | 1.138           | 0.905           | 0.844           | 0.084           | 0.471           | 6.449           | 0.961           | 0.353           | 0.999           | 2.177           | 1.763           | 3.240           | 0.687           |
| n-Hexacosane             | 0.356        | 0.593           | 3.794           | 2.313           | 2.303           | 1.340           | 1.677           | 1.276           | 3.659           | 0.203           | 0.867           | 14.098          | 2.120           | 0.782           | 1.726           | 5.687           | 4.030           | 5.122           | 0.843           |
| n-Octacosane             | 0.459        | 1.679           | 5.385           | 3.842           | 3.383           | 3.106           | 3.193           | 1.128           | 17.072          | 0.283           | 2.588           | 15.449          | 4.222           | 1.038           | 2.356           | 13.909          | 10.572          | 8.608           | 1.166           |
| n-Triacontane            | 0.757        | 2.492           | 6.002           | 4.827           | 3.922           | 4.614           | 4.022           | 0.966           | 29.877          | 0.335           | 4.078           | 18.396          | 6.193           | 1.073           | 2.487           | 22.979          | 16.752          | 10.185          | 1.215           |
| n-Dotriacontane          | 0.680        | 1.342           | 3.050           | 3.048           | 2.491           | 2.571           | 2.129           | 0.653           | 16.829          | 0.301           | 2.524           | 15.532          | 4.164           | 0.618           | 1.971           | 19.468          | 10.669          | 5.278           | 0.716           |
| n-Tetratriacontane       | 0.538        | 0.826           | 1.990           | 1.980           | 2.013           | 1.669           | 1.397           | 0.374           | 10.151          | 0.115           | 1.837           | 3.402           | 2.827           | 0.408           | 0.883           | 14.482          | 6.725           | 3.390           | 0.513           |
| n-Hexatriacontane        | 0.447        | 0.612           | 1.400           | 1.715           | 1.770           | 1.945           | 1.077           | 0.148           | 8.162           | 0.146           | 1.743           | 3.484           | 2.283           | 0.195           | 1.525           | 44.538          | 5.805           | 2.526           | 0.778           |
| n-Octatriacontane        | 0.284        | 0.193           | 0.811           | 1.008           | 0.829           | 0.748           | 0.579           | 0.002           | 5.239           | 0.068           | 1.007           | 3.734           | 1.471           | 0.123           | 0.170           | 0.026           | 4.078           | 1.819           | 0.558           |
| n-Tetracontane           | 3.711        | 10.153          | 14.182          | 29.156          | 9.095           | 11.248          | 7.960           | 0.000           | 1.431           | 1.855           | 2.096           | 9.719           | 31.741          | 0.068           | 0.094           | 0.000           | 122.964         | 50.839          | 26.755          |
|                          |              |                 |                 |                 |                 |                 |                 |                 |                 |                 |                 |                 |                 |                 |                 |                 |                 |                 |                 |
|                          |              |                 |                 |                 |                 |                 |                 |                 |                 |                 |                 |                 |                 |                 |                 |                 |                 |                 |                 |
|                          |              |                 |                 |                 |                 |                 |                 |                 |                 |                 |                 |                 |                 |                 |                 |                 |                 |                 |                 |
| <b>Depth -3 m</b>        |              |                 |                 |                 |                 |                 |                 |                 |                 |                 |                 |                 |                 |                 |                 |                 |                 |                 |                 |
| <b>Compound</b>          | <b>start</b> | <b>17-2 mid</b> | <b>17-4 mid</b> | <b>17-6 mid</b> | <b>17-8 mid</b> | <b>18-2 mid</b> | <b>18-5 mid</b> | <b>19-1 mid</b> | <b>21-1 mid</b> | <b>23-1 mid</b> | <b>23-3 mid</b> | <b>24-1 mid</b> | <b>24-2 mid</b> | <b>24-3 mid</b> | <b>24-5 mid</b> | <b>27-1 mid</b> | <b>28-1 mid</b> | <b>28-2 mid</b> | <b>29-1 mid</b> |
| Naphthalene              | 0.003        | 0.002           | 0.003           | 0.730           | 0.896           | 0.661           | 0.065           | 0.058           | 0.000           | 0.432           | 0.704           | 1.436           | -               | 0.000           | 0.268           | 1.607           | 0.999           | 0.984           | 0.023           |
| Acenaphthylene           | 0.000        | 0.000           | 0.000           | 0.098           | 0.000           | 0.000           | 0.000           | 0.000           | 0.000           | 0.000           | 0.000           | 0.000           | -               | 0.000           | 0.000           | 0.000           | 0.000           | 0.000           | 0.000           |
| Acenaphthene             | 0.000        | 0.000           | 0.000           | 0.000           | 0.022           | 0.002           | 0.000           | 0.000           | 0.000           | 0.000           | 0.000           | 0.000           | -               | 0.000           | 0.000           | 0.000           | 0.000           | 0.000           | 0.000           |
| Fluorene                 | 0.000        | 0.083           | 0.000           | 0.000           | 0.000           | 0.000           | 0.046           | 0.000           | 0.002           | 0.000           | 0.000           | 0.000           | -               | 0.000           | 0.000           | 0.000           | 0.000           | 0.000           | 0.000           |
| Phenanthrene             | 0.033        | 0.313           | 0.403           | 0.377           | 0.396           | 0.639           | 0.002           | 0.000           | 0.005           | 0.003           | 0.000           | 0.000           | -               | 0.000           | 0.000           | 0.672           | 0.273           | 0.195           | 0.004           |
| Anthracene               | 0.001        | 0.088           | 0.103           | 0.212           | 0.172           | 0.164           | 0.001           | 0.000           | 0.000           | 0.000           | 0.000           | 0.000           | -               | 0.000           | 0.000           | 0.000           | 0.000           | 0.000           | 0.001           |
| Fluoranthene             | 0.000        | 0.000           | 0.000           | 0.000           | 0.000           | 0.000           | 0.000           | 0.000           | 0.000           | 0.000           | 0.000           | 0.000           | -               | 0.000           | 0.000           | 0.000           | 0.000           | 0.000           | 0.000           |
| Pyrene                   | 0.000        | 0.000           | 0.000           | 0.000           | 0.000           | 0.000           | 0.000           | 0.000           | 0.000           | 0.000           | 0.000           | 0.000           | -               | 0.000           | 0.000           | 0.000           | 0.000           | 0.000           | 0.000           |
| Chrysene                 | 0.000        | 0.000           | 0.000           | 0.000           | 0.000           | 0.000           | 0.000           | 0.000           | 0.000           | 0.000           | 0.000           | 0.000           | -               | 0.000           | 0.000           | 0.000           | 0.000           | 0.000           | 0.000           |
| Benzo(a)anthracene       | 0.000        | 0.000           | 0.000           | 0.000           | 0.000           | 0.000           | 0.000           | 0.000           | 0.000           | 0.000           | 0.000           | 0.000           | -               | 0.000           | 0.000           | 0.000           | 0.000           | 0.000           | 0.000           |
| Benzo(b)fluoranthene     | 0.000        | 0.000           | 0.000           | 0.000           | 0.000           | 0.000           | 0.000           | 0.000           | 0.000           | 0.000           | 0.000           | 0.000           | -               | 0.000           | 0.000           | 0.000           | 0.000           | 0.000           | 0.000           |
| Benzo(k)fluoranthene     | 0.000        | 0.000           | 0.000           | 0.000           | 0.000           | 0.000           | 0.000           | 0.000           | 0.000           | 0.000           | 0.000           | 0.000           | -               | 0.000           | 0.000           | 0.000           | 0.000           | 0.000           | 0.000           |
| Benzo(a)pyrene           | 0.000        | 0.000           | 0.000           | 0.000           | 0.000           | 0.000           | 0.000           | 0.000           | 0.000           | 0.000           | 0.000           | 0.000           | -               | 0.000           | 0.000           | 0.000           | 0.000           | 0.000           | 0.000           |
| Indeno(123-cd)pyrene     | 0.000        | 0.000           | 0.000           | 0.000           | 0.000           | 0.000           | 0.000           | 0.000           | 0.000           | 0.000           | 0.000           | 0.000           | -               | 0.000           | 0.000           | 0.000           | 0.000           | 0.000           | 0.000           |
| Dibenzo(ah)anthracene    | 0.000        | 0.000           | 0.000           | 0.000           | 0.000           | 0.000           | 0.000           | 0.000           | 0.000           | 0.000           | 0.000           | 0.000           | -               | 0.000           | 0.000           | 0.000           | 0.000           | 0.000           | 0.000           |
| Benzo(ghi)perylene       | 0.000        | 0.000           | 0.000           | 0.000           | 0.000           | 0.000           | 0.000           | 0.000           | 0.000           | 0.000           | 0.000           | 0.000           | -               | 0.000           | 0.000           | 0.000           | 0.000           | 0.000           | 0.000           |
|                          |              |                 |                 |                 |                 |                 |                 |                 |                 |                 |                 |                 | -               |                 |                 |                 |                 |                 |                 |
| 2 Methylnaphthalene      | 0.076        | 0.011           | 0.078           | 0.063           | 0.091           | 0.073           | 0.002           | 0.024           | 0.010           | 0.081           | 0.152           | 0.172           | -               | 0.000           | 0.029           | 0.240           | 0.201           | 0.123           | 0.557           |
| 1 Methylnaphthalene      | 0.080        | 0.010           | 0.078           | 0.100           | 0.088           | 0.086           | 0.002           | 0.021           | 0.014           | 0.100           | 0.144           | 0.188           | -               | 0.001           | 0.027           | 0.291           | 0.180           | 0.123           | 0.583           |
| 2,6, Dimethylnaphthalene | 0.000        | 0.000           | 0.000           | 0.000           | 0.000           | 0.000           | 0.000           | 0.005           | 0.009           | 0.023           | 0.042           | 0.048           | -               | 0.000           | 0.000           | 0.056           | 0.056           | 0.037           | 0.000           |
| 1,6, Dimethylnaphthalene | 0.000        | 0.000           | 0.000           | 0.000           | 0.000           | 0.000           | 0.000           | 0.016           | 0.041           | 0.000           | 0.077           | 0.096           | -               | 0.000           | 0.000           | 0.172           | 0.099           | 0.088           | 0.000           |
| 1,2, Dimethylnaphthalene | 0.000        | 0.000           | 0.000           | 0.000           | 0.000           | 0.000           | 0.000           | 0.000           | 0.000           | 0.000           | 0.000           | 0.000           | -               | 0.000           | 0.000           | 0.000           | 0.000           | 0.000           | 0.000           |
| 3 Methylanthracene       | 0.000        | 0.000           | 0.000           | 0.000           | 0.000           | 0.000           | 0.000           | 0.000           | 0.000           | 0.000           | 0.000           | 0.000           | -               | 0.000           | 0.000           | 0.000           | 0.000           | 0.000           | 0.000           |
| 3 Methylphenanthrene     | 0.000        | 0.000           | 0.000           | 0.000           | 0.000           | 0.000           | 0.000           | 0.000           | 0.000           | 0.000           | 0.000           | 0.000           | -               | 0.000           | 0.000           | 0.000           | 0.000           | 0.000           | 0.000           |



|                          |       |        |   |   |   |   |       |        |        |        |       |        |       |   |        |       |        |        |       |       |
|--------------------------|-------|--------|---|---|---|---|-------|--------|--------|--------|-------|--------|-------|---|--------|-------|--------|--------|-------|-------|
| Benzo(k)fluoranthene     | 0.000 | 0.000  | - | - | - | - | 0.000 | 0.000  | 0.000  | 0.000  | 0.000 | 0.000  | 0.000 | - | -      | 0.000 | 0.000  | 0.000  | 0.000 | 0.000 |
| Benzo(a)pyrene           | 0.000 | 0.000  | - | - | - | - | 0.000 | 0.000  | 0.000  | 0.000  | 0.000 | 0.000  | 0.000 | - | -      | 0.000 | 0.000  | 0.000  | 0.000 | 0.000 |
| Indeno(123-cd)pyrene     | 0.000 | 0.000  | - | - | - | - | 0.000 | 0.000  | 0.000  | 0.000  | 0.000 | 0.000  | 0.000 | - | -      | 0.000 | 0.000  | 0.000  | 0.000 | 0.000 |
| Dibenzo(ah)anthracene    | 0.000 | 0.000  | - | - | - | - | 0.000 | 0.000  | 0.000  | 0.000  | 0.000 | 0.000  | 0.000 | - | -      | 0.000 | 0.000  | 0.000  | 0.000 | 0.000 |
| Benzo(ghi)perylene       | 0.000 | 0.000  | - | - | - | - | 0.000 | 0.000  | 0.000  | 0.000  | 0.000 | 0.000  | 0.000 | - | -      | 0.000 | 0.000  | 0.000  | 0.000 | 0.000 |
| 2 Methylnaphthalene      | 0.073 | 0.133  | - | - | - | - | 0.066 | 0.081  | 0.007  | 0.239  | 0.003 | 0.164  | -     | - | 1.019  | 0.423 | 0.116  | 0.329  | 0.429 |       |
| 1 Methylnaphthalene      | 0.075 | 0.110  | - | - | - | - | 0.089 | 0.107  | 0.007  | 0.252  | 0.002 | 0.164  | -     | - | 0.856  | 0.377 | 0.147  | 0.311  | 0.439 |       |
| 2,6, Dimethylnaphthalene | 0.002 | 0.062  | - | - | - | - | 0.000 | 0.000  | 0.000  | 0.000  | 0.000 | 0.049  | -     | - | 0.042  | 0.550 | 0.057  | 0.051  | 0.191 |       |
| 1,6, Dimethylnaphthalene | 0.001 | 0.198  | - | - | - | - | 0.000 | 0.000  | 0.000  | 0.000  | 0.000 | 0.087  | -     | - | 0.720  | 0.428 | 0.105  | 0.123  | 0.205 |       |
| 1,2, Dimethylnaphthalene | 0.000 | 0.000  | - | - | - | - | 0.000 | 0.000  | 0.000  | 0.000  | 0.000 | 0.000  | -     | - | 0.000  | 0.000 | 0.000  | 0.000  | 0.000 |       |
| 3 Methylanthracene       | 0.000 | 0.000  | - | - | - | - | 0.000 | 0.000  | 0.000  | 0.000  | 0.000 | 0.000  | -     | - | 0.000  | 0.000 | 0.000  | 0.000  | 0.000 |       |
| 3 Methylphenanthrene     | 0.000 | 0.000  | - | - | - | - | 0.000 | 0.000  | 0.000  | 0.000  | 0.000 | 0.000  | -     | - | 0.000  | 0.000 | 0.000  | 0.000  | 0.000 |       |
| 2 Methylphenanthrene     | 0.000 | 0.000  | - | - | - | - | 0.000 | 0.000  | 0.000  | 0.000  | 0.000 | 0.000  | -     | - | 0.000  | 0.000 | 0.000  | 0.000  | 0.000 |       |
| 9 Methylphenanthrene     | 0.000 | 0.000  | - | - | - | - | 0.000 | 0.000  | 0.000  | 0.000  | 0.000 | 0.000  | -     | - | 0.000  | 0.000 | 0.000  | 0.000  | 0.000 |       |
| 1 Methylphenanthrene     | 0.000 | 0.000  | - | - | - | - | 0.000 | 0.000  | 0.000  | 0.000  | 0.000 | 0.000  | -     | - | 0.000  | 0.000 | 0.000  | 0.000  | 0.000 |       |
| 1,7 Dimethylphenanthrene | 0.000 | 0.000  | - | - | - | - | 0.000 | 0.000  | 0.000  | 0.197  | 0.000 | 0.000  | -     | - | 0.002  | 0.000 | 0.000  | 0.000  | 0.000 |       |
| 1+3 Methylfluoranthene   | 0.000 | 0.000  | - | - | - | - | 0.000 | 0.000  | 0.000  | 0.000  | 0.000 | 0.000  | -     | - | 0.000  | 0.000 | 0.000  | 0.000  | 0.000 |       |
| Retene                   | 0.000 | 0.000  | - | - | - | - | 0.000 | 0.000  | 0.000  | 0.000  | 0.000 | 0.000  | -     | - | 0.000  | 0.000 | 0.000  | 0.000  | 0.000 |       |
| 3 Methylpyrene           | 0.000 | 0.000  | - | - | - | - | 0.000 | 0.000  | 0.000  | 0.000  | 0.000 | 0.000  | -     | - | 0.000  | 0.000 | 0.000  | 0.000  | 0.000 |       |
| 1 Methylpyrene           | 0.000 | 0.000  | - | - | - | - | 0.000 | 0.000  | 0.000  | 0.000  | 0.000 | 0.000  | -     | - | 0.000  | 0.000 | 0.000  | 0.000  | 0.000 |       |
| 3 Methylchrysene         | 0.000 | 0.000  | - | - | - | - | 0.000 | 0.000  | 0.000  | 0.000  | 0.000 | 0.000  | -     | - | 0.000  | 0.000 | 0.000  | 0.000  | 0.000 |       |
| 6 Methylchrysene         | 0.000 | 0.000  | - | - | - | - | 0.000 | 0.000  | 0.000  | 0.000  | 0.000 | 0.000  | -     | - | 0.000  | 0.000 | 0.000  | 0.000  | 0.000 |       |
| n-Decane                 | 0.098 | 0.235  | - | - | - | - | 0.524 | 1.682  | 0.002  | 3.202  | 0.000 | 0.008  | -     | - | 0.054  | 0.101 | 0.000  | 0.000  | 0.362 |       |
| n-Dodecane               | 0.587 | 0.210  | - | - | - | - | 3.624 | 3.246  | 0.228  | 3.435  | 0.000 | 0.423  | -     | - | 0.098  | 0.435 | 0.530  | 0.879  | 3.095 |       |
| n-Tetradecane            | 0.452 | 0.817  | - | - | - | - | 7.646 | 10.203 | 1.524  | 2.576  | 0.065 | 3.834  | -     | - | 0.625  | 0.254 | 2.707  | 3.253  | 9.482 |       |
| n-Hexadecane             | 0.048 | 0.075  | - | - | - | - | 0.188 | 0.224  | 0.238  | 0.384  | 0.017 | 0.331  | -     | - | 0.058  | 0.000 | 0.388  | 0.481  | 1.018 |       |
| n-Heptadecane            | 0.015 | 0.040  | - | - | - | - | 3.433 | 2.565  | 0.001  | 0.446  | 0.000 | 0.000  | -     | - | 0.000  | 0.000 | 0.000  | 0.000  | 0.124 |       |
| Pristane                 | 0.012 | 0.007  | - | - | - | - | 3.399 | 2.528  | 0.002  | 0.458  | 0.000 | 0.000  | -     | - | 0.000  | 0.000 | 0.000  | 0.000  | 0.768 |       |
| n-Octadecane             | 0.034 | 0.046  | - | - | - | - | 1.093 | 0.172  | 0.001  | 0.425  | 0.000 | 0.000  | -     | - | 0.020  | 0.000 | 0.000  | 0.000  | 0.131 |       |
| Phytane                  | 0.028 | 0.009  | - | - | - | - | 1.098 | 1.021  | 0.002  | 1.073  | 0.000 | 0.000  | -     | - | 0.001  | 0.000 | 0.000  | 0.000  | 0.381 |       |
| n-Eicosane               | 0.042 | 0.071  | - | - | - | - | 0.233 | 0.395  | 0.001  | 0.003  | 0.000 | 0.000  | -     | - | 0.016  | 0.000 | 0.000  | 0.005  | 0.315 |       |
| n-Docosane               | 0.115 | 0.322  | - | - | - | - | 0.294 | 0.764  | 0.155  | 0.575  | 0.018 | 0.057  | -     | - | 0.072  | 0.024 | 0.032  | 0.024  | 0.880 |       |
| n-Tetracosane            | 0.429 | 2.148  | - | - | - | - | 1.467 | 3.054  | 0.528  | 3.743  | 0.096 | 0.783  | -     | - | 1.134  | 0.148 | 0.854  | 0.760  | 1.421 |       |
| n-Hexacosane             | 0.594 | 2.634  | - | - | - | - | 1.378 | 2.381  | 1.259  | 9.499  | 0.135 | 1.621  | -     | - | 3.629  | 0.357 | 1.661  | 1.501  | 1.088 |       |
| n-Octacosane             | 1.048 | 3.213  | - | - | - | - | 2.269 | 3.109  | 3.468  | 14.282 | 0.089 | 2.868  | -     | - | 8.303  | 0.632 | 2.896  | 3.014  | 1.873 |       |
| n-Triacontane            | 1.396 | 3.116  | - | - | - | - | 2.718 | 3.338  | 5.500  | 16.450 | 0.086 | 3.773  | -     | - | 12.702 | 0.780 | 3.922  | 4.319  | 2.417 |       |
| n-Dotriacontane          | 0.670 | 1.645  | - | - | - | - | 1.405 | 1.603  | 3.152  | 9.355  | 0.119 | 2.329  | -     | - | 4.663  | 0.494 | 2.322  | 2.928  | 1.357 |       |
| n-Tetratriacontane       | 0.398 | 0.824  | - | - | - | - | 1.033 | 1.126  | 2.186  | 7.996  | 0.097 | 1.537  | -     | - | 7.894  | 0.312 | 1.630  | 1.982  | 1.022 |       |
| n-Hextatriacontane       | 0.337 | 0.632  | - | - | - | - | 1.553 | 1.294  | 1.667  | 7.727  | 0.057 | 1.026  | -     | - | 0.974  | 0.051 | 1.328  | 1.750  | 1.932 |       |
| n-Octatriacontane        | 0.157 | 0.437  | - | - | - | - | 0.496 | 0.490  | 1.203  | 2.360  | 0.000 | 0.609  | -     | - | 4.365  | 0.181 | 0.919  | 1.191  | 0.453 |       |
| n-Tetracontane           | 1.712 | 10.108 | - | - | - | - | 8.349 | 32.171 | 39.198 | 64.332 | 0.000 | 11.227 | -     | - | 5.787  | 0.109 | 23.391 | 33.459 | 8.098 |       |

Supplementary Table 4. Hydrocarbon analysis in seawater samples at the ES-2009 spill at 1.5m depth.

|                         | Inside slick  |               |               |                 |                       |                      |                 |               |               | Slick Edge   |               |               | Outside slick |               |               |               |               |               |
|-------------------------|---------------|---------------|---------------|-----------------|-----------------------|----------------------|-----------------|---------------|---------------|--------------|---------------|---------------|---------------|---------------|---------------|---------------|---------------|---------------|
| Time (h)                | 0.000         | 3.090         | 16.800        | 16.800          | 19.100                | 19.100               | 19.100          | 22.100        | 24.700        | 0.000        | 16.800        | 19.100        | 0.000         | 3.090         | 16.840        | 19.070        | 22.070        | 24.730        |
| Conc µg/l               | M 2 I<br>1.5m | M 3 I<br>1.5m | M 4 I<br>1.5m | M 4<br>1,5m / 2 | M 5 I<br>1.5m/1<br>S1 | M 5<br>1,5m /1<br>S2 | M 5<br>1,5m / 2 | M 6 I<br>1,5m | M 7 I<br>1,5m | M2 E<br>1.5m | M 4 E<br>1.5m | M 5 E<br>1.5m | M 2 O<br>1.5m | M 3 O<br>1.5m | M 4 O<br>1.5m | M 5 O<br>1.5m | M 6 O<br>1.5m | M 7 O<br>1.5m |
| Naphthalene             | 0.042         | 0.189         | 0.666         | 0.721           | 0.670                 | 0.238                | 0.748           | 0.343         | 0.248         | 0.034        | 0.250         | 0.503         | 0.062         | 0.185         | 0.229         | 0.413         | 0.367         | 0.178         |
| 2-Methylnaphthalene     | 0.021         | 0.084         | 0.138         | 0.605           | 0.597                 | 0.072                | 0.556           | 0.099         | 0.114         | 0.011        | 0.102         | 0.451         | 0.000         | 0.066         | 0.114         | 0.161         | 0.132         | 0.070         |
| 1-Methylnaphthalene     | 0.006         | 0.045         | 0.092         | 0.424           | 0.402                 | 0.049                | 0.320           | 0.067         | 0.080         | 0.006        | 0.068         | 0.275         | 0.000         | 0.037         | 0.061         | 0.093         | 0.085         | 0.048         |
| 2,6 Dimethylnaphthalene | 0.004         | 0.013         | 0.024         | 0.011           | 0.000                 | 0.012                | 0.078           | 0.017         | 0.024         | 0.001        | 0.019         | 0.003         | 0.000         | 0.008         | 0.013         | 0.030         | 0.027         | 0.013         |
| 1,6 Dimethylnaphthalene | 0.002         | 0.009         | 0.019         | 0.008           | 0.000                 | 0.010                | 0.073           | 0.009         | 0.016         | 0.001        | 0.015         | 0.002         | 0.000         | 0.006         | 0.012         | 0.022         | 0.019         | 0.009         |
| 1,2 Dimethylnaphthalene | 0.000         | 0.000         | 0.000         | 0.000           | 0.000                 | 0.000                | 0.000           | 0.000         | 0.000         | 0.000        | 0.000         | 0.000         | 0.000         | 0.000         | 0.000         | 0.000         | 0.000         | 0.000         |
| Acenaphthylene          | 0.000         | 0.004         | 0.003         | 0.008           | 0.000                 | 0.004                | 0.009           | 0.001         | 0.002         | 0.003        | 0.001         | 0.000         | 0.000         | 0.004         | 0.002         | 0.004         | 0.008         | 0.004         |
| Acenaphthene            | 0.001         | 0.019         | 0.005         | 0.007           | 0.000                 | 0.012                | 0.013           | 0.003         | 0.000         | 0.001        | 0.006         | 0.001         | 0.000         | 0.008         | 0.013         | 0.011         | 0.000         | 0.005         |
| Fluorene                | 0.017         | 0.228         | 0.290         | 0.179           | 0.017                 | 0.312                | 0.004           | 0.320         | 0.318         | 0.025        | 0.276         | 0.026         | 0.000         | 0.195         | 0.311         | 0.386         | 0.406         | 0.228         |
| Phenanthrene            | 0.005         | 0.067         | 0.055         | 0.134           | 0.195                 | 0.335                | 0.088           | 0.693         | 0.048         | 0.006        | 0.052         | 0.055         | 0.000         | 0.040         | 0.086         | 0.064         | 0.082         | 0.046         |
| 2-Methylphenanthrene    | 0.001         | 0.005         | 0.004         | 0.000           | 0.000                 | 0.000                | 0.000           | 0.000         | 0.000         | 0.000        | 0.000         | 0.000         | 0.000         | 0.000         | 0.000         | 0.000         | 0.000         | 0.000         |
| 1-Methylphenanthrene    | 0.001         | 0.003         | 0.005         | 0.000           | 0.000                 | 0.000                | 0.000           | 0.000         | 0.000         | 0.000        | 0.000         | 0.000         | 0.000         | 0.000         | 0.000         | 0.000         | 0.000         | 0.000         |
| Anthracene              | 0.002         | 0.035         | 0.021         | 0.028           | 0.000                 | 0.103                | 0.000           | 0.000         | 0.005         | 0.002        | 0.056         | 0.002         | 0.000         | 0.037         | 0.071         | 0.038         | 0.000         | 0.007         |
| 2-Methylantracene       | 0.000         | 0.000         | 0.000         | 0.000           | 0.000                 | 0.000                | 0.000           | 0.000         | 0.000         | 0.000        | 0.000         | 0.000         | 0.000         | 0.000         | 0.000         | 0.000         | 0.000         | 0.000         |
| Fluoranthene            | 0.002         | 0.000         | 0.005         | 0.000           | 0.000                 | 0.000                | 0.000           | 0.000         | 0.005         | 0.002        | 0.000         | 0.001         | 0.000         | 0.000         | 0.000         | 0.000         | 0.000         | 0.005         |
| Pyrene                  | 0.002         | 0.000         | 0.008         | 0.000           | 0.000                 | 0.009                | 0.000           | 0.001         | 0.006         | 0.003        | 0.000         | 0.001         | 0.000         | 0.000         | 0.000         | 0.001         | 0.000         | 0.010         |
| Chrysene                | 0.000         | 0.000         | 0.001         | 0.000           | 0.000                 | 0.000                | 0.000           | 0.000         | 0.000         | 0.000        | 0.000         | 0.000         | 0.000         | 0.000         | 0.000         | 0.000         | 0.000         | 0.000         |
| 6-Methylchrysene        | 0.000         | 0.000         | 0.000         | 0.000           | 0.000                 | 0.000                | 0.000           | 0.000         | 0.000         | 0.000        | 0.000         | 0.000         | 0.000         | 0.000         | 0.000         | 0.000         | 0.000         | 0.000         |
| Benzo(a)anthracene      | 0.000         | 0.000         | 0.001         | 0.000           | 0.000                 | 0.000                | 0.000           | 0.000         | 0.000         | 0.000        | 0.000         | 0.000         | 0.000         | 0.000         | 0.000         | 0.000         | 0.000         | 0.000         |
| Benzo(b)fluoranthene    | 0.000         | 0.000         | 0.000         | 0.000           | 0.000                 | 0.000                | 0.000           | 0.000         | 0.000         | 0.000        | 0.000         | 0.000         | 0.000         | 0.000         | 0.000         | 0.000         | 0.000         | 0.000         |
| Benzo(k)fluoranthene    | 0.000         | 0.000         | 0.000         | 0.000           | 0.000                 | 0.000                | 0.000           | 0.000         | 0.000         | 0.000        | 0.000         | 0.000         | 0.000         | 0.000         | 0.000         | 0.000         | 0.000         | 0.000         |
| Benzo(a)pyrene          | 0.000         | 0.000         | 0.000         | 0.000           | 0.000                 | 0.000                | 0.000           | 0.000         | 0.000         | 0.000        | 0.000         | 0.000         | 0.000         | 0.000         | 0.000         | 0.000         | 0.000         | 0.000         |
| Indeno(1,2,3,cd)pyrene  | 0.000         | 0.000         | 0.000         | 0.000           | 0.000                 | 0.000                | 0.000           | 0.000         | 0.000         | 0.000        | 0.000         | 0.000         | 0.000         | 0.000         | 0.000         | 0.000         | 0.000         | 0.000         |
| Dibenzo(a,h)anthracene  | 0.000         | 0.000         | 0.000         | 0.000           | 0.000                 | 0.000                | 0.000           | 0.000         | 0.000         | 0.000        | 0.000         | 0.000         | 0.000         | 0.000         | 0.000         | 0.000         | 0.000         | 0.000         |
| Benzo(g,h,i)pyrene      | 0.000         | 0.000         | 0.000         | 0.000           | 0.000                 | 0.000                | 0.000           | 0.000         | 0.000         | 0.000        | 0.000         | 0.000         | 0.000         | 0.000         | 0.000         | 0.000         | 0.000         | 0.000         |
|                         |               |               |               |                 |                       |                      |                 |               |               |              |               |               |               |               |               |               |               |               |
| n - Hexane              | 0.000         | 0.000         | 0.000         | 0.000           | 0.000                 | 0.000                | 0.000           | 0.000         | 0.000         | 0.000        | 0.000         | 0.000         | 0.000         | 0.000         | 0.000         | 0.000         | 0.000         | 0.000         |
| n - Heptane             | 0.000         | 0.000         | 0.000         | 0.000           | 0.000                 | 0.000                | 0.000           | 0.000         | 0.000         | 0.000        | 0.000         | 0.000         | 0.000         | 0.000         | 0.000         | 0.000         | 0.000         | 0.000         |
| n-Octane                | 2.300         | 1.761         | 10.062        | 0.000           | 4.706                 | 8.781                | 2.750           | 14.992        | 14.626        | 0.000        | 0.000         | 5.496         | 0.295         | 1.039         | 4.701         | 2.240         | 6.727         | 19.039        |
| n-Nonane                | 0.000         | 0.000         | 0.000         | 0.000           | 0.000                 | 0.297                | 0.122           | 1.887         | 0.000         | 0.000        | 0.000         | 0.000         | 0.000         | 0.000         | 0.000         | 0.070         | 4.668         | 0.476         |
| n-Decane                | 5.659         | 5.748         | 4.921         | 2.349           | 4.205                 | 4.665                | 4.828           | 6.216         | 6.141         | 4.439        | 5.627         | 4.609         | 3.287         | 0.312         | 2.959         | 5.288         | 6.485         | 7.052         |
| n-Undecane              | 1.349         | 1.256         | 2.065         | 1.237           | 0.059                 | 0.967                | 1.160           | 0.860         | 0.821         | 1.285        | 0.728         | 1.660         | 1.283         | 0.761         | 1.408         | 2.354         | 0.617         | 0.899         |
| n-Dodecane              | 0.476         | 0.378         | 1.434         | 1.165           | 0.572                 | 1.391                | 1.493           | 2.164         | 0.919         | 0.528        | 0.655         | 0.792         | 1.117         | 0.561         | 0.971         | 1.504         | 1.377         | 2.789         |
|                         |               |               |               |                 |                       |                      |                 |               |               |              |               |               |               |               |               |               |               |               |
|                         |               |               |               |                 |                       |                      |                 |               |               |              |               |               |               |               |               |               |               |               |
| n-Tetradecane           | 0.062         | 1.204         | 0.363         | 2.073           | 3.450                 | 3.731                | 2.558           | 4.682         | 2.579         | 0.000        | 0.859         | 1.298         | 0.114         | 1.236         | 3.748         | 7.423         | 5.362         | 3.428         |
| n-Hexadecane            | 0.000         | 0.000         | 0.085         | 1.011           | 0.000                 | 0.000                | 2.260           | 1.634         | 1.318         | 0.026        | 0.000         | 0.424         | 0.000         | 0.000         | 0.000         | 0.702         | 2.519         | 1.067         |

|                    |       |       |        |        |        |       |       |        |        |       |       |        |       |       |       |       |       |       |
|--------------------|-------|-------|--------|--------|--------|-------|-------|--------|--------|-------|-------|--------|-------|-------|-------|-------|-------|-------|
| n-Heptadecane      | 0.000 | 0.000 | 0.076  | 0.901  | 0.000  | 0.000 | 1.347 | 1.209  | 0.000  | 0.000 | 0.000 | 0.280  | 0.000 | 0.000 | 0.000 | 0.000 | 0.000 | 0.000 |
| Pristane           | 0.000 | 0.000 | 0.022  | 0.000  | 0.000  | 0.000 | 0.125 | 0.000  | 0.000  | 0.000 | 0.000 | 0.000  | 0.000 | 0.000 | 0.000 | 0.000 | 0.000 | 0.000 |
| n-Octadecane       | 0.000 | 0.000 | 0.046  | 0.483  | 0.000  | 0.000 | 0.000 | 0.000  | 0.000  | 0.000 | 0.000 | 0.000  | 0.000 | 0.000 | 0.000 | 0.000 | 0.000 | 0.000 |
| Phytane            | 0.000 | 0.000 | 0.023  | 0.000  | 0.000  | 0.000 | 0.000 | 0.000  | 0.000  | 0.000 | 0.000 | 0.000  | 0.000 | 0.000 | 0.000 | 0.000 | 0.000 | 0.000 |
| n-Eicosane         | 0.000 | 0.000 | 0.025  | 0.795  | 0.000  | 0.000 | 0.511 | 0.829  | 0.687  | 0.000 | 0.000 | 0.000  | 0.000 | 0.000 | 0.000 | 0.000 | 0.000 | 0.000 |
| n-Docosane         | 0.058 | 0.000 | 0.151  | 2.669  | 2.983  | 1.661 | 1.052 | 1.553  | 1.820  | 0.000 | 0.000 | 0.235  | 0.000 | 0.076 | 0.000 | 0.746 | 2.600 | 1.602 |
| n-Tetracosane      | 0.064 | 0.356 | 0.209  | 4.452  | 2.374  | 3.171 | 3.480 | 1.732  | 2.148  | 0.017 | 0.427 | 0.390  | 0.000 | 0.138 | 0.226 | 1.618 | 2.386 | 1.564 |
| n-Hexacosane       | 0.000 | 0.043 | 0.097  | 1.333  | 1.287  | 1.667 | 1.431 | 0.480  | 0.879  | 0.000 | 0.188 | 0.101  | 0.000 | 0.149 | 0.000 | 1.105 | 1.893 | 1.055 |
| n-Octacosane       | 0.072 | 0.365 | 0.106  | 0.864  | 0.758  | 0.900 | 0.834 | 0.000  | 1.227  | 0.025 | 0.186 | 0.176  | 0.000 | 0.314 | 0.376 | 0.702 | 0.000 | 0.000 |
| n-Triacontane      | 0.087 | 0.341 | 0.211  | 1.064  | 0.000  | 0.694 | 2.818 | 0.403  | 1.750  | 0.000 | 0.426 | 0.233  | 0.000 | 0.580 | 0.000 | 0.000 | 0.000 | 0.000 |
| n-Dotriacontane    | 0.083 | 0.000 | 0.137  | 0.000  | 0.000  | 0.000 | 1.157 | 0.000  | 1.192  | 0.000 | 0.000 | 0.000  | 0.000 | 0.513 | 0.000 | 0.000 | 0.000 | 0.000 |
| n-Tetratriacontane | 0.000 | 0.000 | 0.106  | 0.000  | 0.000  | 0.000 | 0.000 | 0.000  | 0.000  | 0.000 | 0.000 | 0.000  | 0.000 | 0.000 | 0.000 | 0.000 | 0.000 | 0.000 |
| n-Hextatriacontane | 0.000 | 0.000 | 0.075  | 0.000  | 0.000  | 0.000 | 0.000 | 0.000  | 0.000  | 0.000 | 0.000 | 0.000  | 0.000 | 0.000 | 0.000 | 0.000 | 0.000 | 0.000 |
| n-Octatriacontane  | 0.000 | 0.000 | 0.000  | 0.000  | 0.000  | 0.000 | 0.000 | 0.000  | 0.000  | 0.000 | 0.000 | 0.000  | 0.000 | 0.000 | 0.000 | 0.000 | 0.000 | 0.000 |
| n-Tetracontane     | 0.000 | 0.000 | 0.000  | 0.000  | 0.000  | 0.000 | 0.000 | 0.000  | 0.000  | 0.000 | 0.000 | 0.000  | 0.000 | 0.000 | 0.000 | 0.000 | 0.000 | 0.000 |
|                    |       |       |        |        |        |       |       |        |        |       |       |        |       |       |       |       |       |       |
| Benzene            | 0.000 | 0.000 | 0.000  | 0.000  | 0.000  | 0.000 | 0.000 | 0.000  | 0.000  | 0.000 | 0.000 | 0.000  | 0.000 | 0.000 | 0.168 | 0.000 | 0.000 | 0.000 |
| Toluene            | 4.814 | 0.871 | 99.766 | 10.190 | 31.785 | 1.408 | 1.278 | 33.690 | 42.743 | 1.443 | 2.254 | 56.187 | 0.000 | 2.205 | 1.172 | 1.242 | 1.800 | 0.646 |
| p + m Xylene       | 0.000 | 0.000 | 0.000  | 0.000  | 0.000  | 0.000 | 0.000 | 0.000  | 0.000  | 0.000 | 0.000 | 0.000  | 0.000 | 0.000 | 0.000 | 0.000 | 0.000 | 0.000 |
| Ethylbenzene       | 0.000 | 0.000 | 0.000  | 0.000  | 0.000  | 0.000 | 0.000 | 0.000  | 0.000  | 0.000 | 0.000 | 0.000  | 0.000 | 0.000 | 0.000 | 0.000 | 0.000 | 0.000 |
| o - Xylene         | 0.000 | 0.000 | 0.000  | 0.000  | 0.000  | 0.000 | 0.000 | 0.000  | 0.000  | 0.000 | 0.000 | 0.000  | 0.000 | 0.000 | 0.000 | 0.000 | 0.000 | 0.000 |

Supplementary Table 5. Hydrocarbon analysis in seawater samples at the ES-2009 spill at 8 m depth.

|                         | Inside slick |             |             |               |               |             |             | Slick edge  |             | Outside slick |             |             |             |             |             |
|-------------------------|--------------|-------------|-------------|---------------|---------------|-------------|-------------|-------------|-------------|---------------|-------------|-------------|-------------|-------------|-------------|
| Time (h)                | 0.000        | 3.090       | 16.800      | 19.100        | 19.100        | 22.100      | 24.700      | 3.090       | 16.800      | 0.000         | 3.090       | 16.840      | 19.070      | 22.070      | 24.730      |
| Concentration (µg/l)    | M 2 I<br>8m  | M 3 I<br>8m | M 4 I<br>8m | M 5 I/2<br>8m | M 5 I/1<br>8m | M 6 I<br>8m | M 7 I<br>8m | M 3 E<br>8m | M 4 E<br>8m | M 2 O<br>8m   | M 3 O<br>8m | M 4 O<br>8m | M 5 O<br>8m | M 6 O<br>8m | M 7 O<br>8m |
| Naphthalene             | 0.055        | 0.242       | 0.244       | 0.337         | 0.340         | 0.270       | 0.218       | 0.188       | 0.201       | 0.058         | 0.209       | 0.232       | 0.504       | 0.242       | 0.171       |
| 2-Methylnaphthalene     | 0.023        | 0.099       | 0.126       | 0.121         | 0.119         | 0.090       | 0.071       | 0.081       | 0.100       | 0.000         | 0.082       | 0.115       | 0.174       | 0.081       | 0.081       |
| 1-Methylnaphthalene     | 0.012        | 0.062       | 0.077       | 0.076         | 0.078         | 0.066       | 0.047       | 0.042       | 0.057       | 0.000         | 0.040       | 0.076       | 0.101       | 0.051       | 0.054       |
| 2,6 Dimethylnaphthalene | 0.006        | 0.068       | 0.035       | 0.025         | 0.022         | 0.019       | 0.014       | 0.010       | 0.021       | 0.000         | 0.009       | 0.023       | 0.032       | 0.014       | 0.017       |
| 1,6 Dimethylnaphthalene | 0.006        | 0.023       | 0.028       | 0.009         | 0.017         | 0.015       | 0.009       | 0.007       | 0.012       | 0.000         | 0.008       | 0.014       | 0.024       | 0.008       | 0.016       |
| 1,2 Dimethylnaphthalene | 0.000        | 0.000       | 0.000       | 0.000         | 0.014         | 0.006       | 0.000       | 0.000       | 0.000       | 0.000         | 0.000       | 0.000       | 0.000       | 0.000       | 0.006       |
| Acenaphthylene          | 0.006        | 0.004       | 0.005       | 0.003         | 0.003         | 0.003       | 0.002       | 0.003       | 0.005       | 0.000         | 0.002       | 0.005       | 0.005       | 0.004       | 0.004       |
| Acenaphthene            | 0.002        | 0.022       | 0.015       | 0.018         | 0.008         | 0.004       | 0.007       | 0.006       | 0.011       | 0.000         | 0.012       | 0.000       | 0.012       | 0.005       | 0.008       |
| Fluorene                | 0.039        | 0.226       | 0.328       | 0.456         | 0.361         | 0.278       | 0.182       | 0.224       | 0.258       | 0.000         | 0.226       | 0.291       | 0.401       | 0.244       | 0.198       |
| Phenanthrene            | 0.014        | 0.129       | 0.106       | 0.131         | 0.093         | 0.056       | 0.033       | 0.048       | 0.053       | 0.000         | 0.029       | 0.053       | 0.068       | 0.047       | 0.042       |
| 2-Methylphenanthrene    | 0.003        | 0.000       | 0.000       | 0.000         | 0.000         | 0.000       | 0.000       | 0.000       | 0.000       | 0.000         | 0.000       | 0.000       | 0.004       | 0.000       | 0.000       |
| 1-Methylphenanthrene    | 0.002        | 0.000       | 0.000       | 0.000         | 0.000         | 0.000       | 0.000       | 0.000       | 0.000       | 0.000         | 0.000       | 0.000       | 0.002       | 0.000       | 0.000       |
| Anthracene              | 0.004        | 0.048       | 0.035       | 0.070         | 0.014         | 0.012       | 0.004       | 0.037       | 0.048       | 0.000         | 0.015       | 0.058       | 0.028       | 0.009       | 0.007       |
| 2-Methylantracene       | 0.000        | 0.000       | 0.000       | 0.000         | 0.000         | 0.000       | 0.000       | 0.000       | 0.000       | 0.000         | 0.000       | 0.000       | 0.000       | 0.000       | 0.000       |
| Fluoranthene            | 0.005        | 0.000       | 0.000       | 0.023         | 0.000         | 0.003       | 0.004       | 0.000       | 0.000       | 0.000         | 0.000       | 0.000       | 0.006       | 0.004       | 0.007       |
| Pyrene                  | 0.007        | 0.000       | 0.000       | 0.012         | 0.000         | 0.010       | 0.005       | 0.000       | 0.000       | 0.000         | 0.000       | 0.000       | 0.012       | 0.007       | 0.002       |
| Chrysene                | 0.000        | 0.000       | 0.000       | 0.000         | 0.000         | 0.000       | 0.001       | 0.000       | 0.000       | 0.000         | 0.000       | 0.000       | 0.012       | 0.000       | 0.000       |
| 6-Methylchrysene        | 0.000        | 0.000       | 0.000       | 0.000         | 0.000         | 0.000       | 0.000       | 0.000       | 0.000       | 0.000         | 0.000       | 0.000       | 0.000       | 0.000       | 0.000       |
| Benzo(a)anthracene      | 0.000        | 0.000       | 0.000       | 0.000         | 0.000         | 0.000       | 0.001       | 0.000       | 0.000       | 0.000         | 0.000       | 0.000       | 0.000       | 0.000       | 0.000       |
| Benzo(b)fluoranthene    | 0.000        | 0.000       | 0.000       | 0.000         | 0.000         | 0.000       | 0.000       | 0.000       | 0.000       | 0.000         | 0.000       | 0.000       | 0.000       | 0.000       | 0.000       |
| Benzo(k)fluoranthene    | 0.000        | 0.000       | 0.000       | 0.000         | 0.000         | 0.000       | 0.000       | 0.000       | 0.000       | 0.000         | 0.000       | 0.000       | 0.000       | 0.000       | 0.000       |
| Benzo(a)pyrene          | 0.000        | 0.000       | 0.000       | 0.000         | 0.000         | 0.000       | 0.000       | 0.000       | 0.000       | 0.000         | 0.000       | 0.000       | 0.000       | 0.000       | 0.000       |
| Indeno(1,2,3,cd)pyrene  | 0.000        | 0.000       | 0.000       | 0.000         | 0.000         | 0.000       | 0.000       | 0.000       | 0.000       | 0.000         | 0.000       | 0.000       | 0.000       | 0.000       | 0.000       |
| Dibenzo(a,h)anthracene  | 0.000        | 0.000       | 0.000       | 0.000         | 0.000         | 0.000       | 0.000       | 0.000       | 0.000       | 0.000         | 0.000       | 0.000       | 0.000       | 0.000       | 0.000       |
| Benzo(g,h,i)pyrene      | 0.000        | 0.000       | 0.000       | 0.000         | 0.000         | 0.000       | 0.000       | 0.000       | 0.000       | 0.000         | 0.000       | 0.000       | 0.000       | 0.000       | 0.000       |
| n - Hexane              | 0.000        | 0.000       | 0.000       | 0.000         | 0.000         | 0.000       | 0.000       | 0.000       | 0.000       | 0.000         | 0.000       | 0.000       | 0.000       | 0.000       | 0.000       |
| n - Heptane             | 0.000        | 0.000       | 0.000       | 0.000         | 0.000         | 0.000       | 0.000       | 0.000       | 0.000       | 0.000         | 0.000       | 0.000       | 0.000       | 0.000       | 0.000       |
| n-Octane                | 1.542        | 2.626       | 9.330       | 13.994        | 13.330        | 14.277      | 9.332       | 3.486       | 5.338       | 0.000         | 0.000       | 0.000       | 0.000       | 0.000       | 0.000       |
| n-Nonane                | 0.000        | 0.170       | 0.000       | 0.000         | 0.157         | 0.106       | 0.000       | 0.000       | 0.000       | 0.558         | 0.080       | 0.000       | 0.000       | 0.708       | 0.970       |
| n-Decane                | 6.018        | 4.587       | 4.766       | 5.707         | 5.338         | 8.411       | 4.535       | 2.053       | 4.790       | 4.772         | 5.786       | 4.454       | 3.953       | 5.423       | 6.336       |
| n-Undecane              | 2.629        | 1.580       | 2.054       | 0.610         | 2.654         | 1.538       | 1.035       | 0.576       | 2.028       | 1.106         | 3.002       | 1.833       | 0.384       | 0.821       | 1.691       |
| n-Dodecane              | 1.291        | 0.562       | 1.531       | 0.869         | 1.839         | 1.350       | 0.264       | 0.496       | 0.548       | 2.170         | 0.882       | 1.422       | 0.500       | 0.376       | 1.992       |
|                         |              |             |             |               |               |             |             |             |             |               |             |             |             |             |             |
|                         |              |             |             |               |               |             |             |             |             |               |             |             |             |             |             |
|                         |              |             |             |               |               |             |             |             |             |               |             |             |             |             |             |
| n-Tetradecane           | 0.164        | 1.859       | 0.905       | 3.559         | 3.711         | 2.821       | 2.662       | 1.286       | 1.695       | 0.000         | 0.895       | 2.338       | 4.334       | 4.950       | 2.398       |
| n-Hexadecane            | 0.000        | 0.000       | 0.205       | 1.837         | 0.122         | 1.173       | 1.564       | 0.000       | 0.000       | 0.000         | 0.109       | 0.000       | 2.543       | 0.922       | 1.446       |



|                   |       |       |       |        |       |       |       |       |       |       |       |       |       |       |       |
|-------------------|-------|-------|-------|--------|-------|-------|-------|-------|-------|-------|-------|-------|-------|-------|-------|
| n-Heptadecane     | 0.000 | 0.000 | 0.158 | 0.000  | 0.000 | 1.886 | 0.752 | 0.000 | 0.000 | 0.000 | 0.000 | 0.000 | 0.000 | 0.000 | 1.097 |
| Pristane          | 0.000 | 0.000 | 0.000 | 0.000  | 0.000 | 0.000 | 0.098 | 0.000 | 0.000 | 0.000 | 0.000 | 0.000 | 0.000 | 0.000 | 0.000 |
| n-Octadecane      | 0.000 | 0.000 | 0.000 | 0.000  | 0.000 | 0.238 | 0.000 | 0.000 | 0.000 | 0.000 | 0.000 | 0.000 | 0.000 | 0.000 | 0.000 |
| Phytane           | 0.000 | 0.000 | 0.000 | 0.000  | 0.000 | 0.000 | 0.000 | 0.000 | 0.000 | 0.000 | 0.000 | 0.000 | 0.000 | 0.000 | 0.000 |
| n-Eicosane        | 0.000 | 0.000 | 0.000 | 0.000  | 0.000 | 0.781 | 0.636 | 0.000 | 0.000 | 0.000 | 0.000 | 0.000 | 0.000 | 0.000 | 1.020 |
| n-Docosane        | 0.022 | 0.000 | 0.421 | 1.236  | 2.045 | 1.619 | 1.740 | 0.129 | 0.000 | 0.000 | 0.040 | 0.000 | 0.601 | 2.316 | 1.481 |
| n-Tetracosane     | 0.047 | 0.000 | 0.543 | 0.563  | 2.340 | 1.976 | 2.353 | 0.231 | 0.000 | 0.000 | 0.127 | 0.000 | 2.634 | 3.359 | 1.300 |
| n-Hexacosane      | 0.000 | 0.000 | 0.465 | 1.792  | 0.306 | 0.514 | 1.264 | 0.066 | 0.000 | 0.000 | 0.081 | 0.000 | 0.355 | 0.000 | 0.322 |
| n-Octacosane      | 0.000 | 0.000 | 0.601 | 2.500  | 0.859 | 0.627 | 1.319 | 0.000 | 0.000 | 0.000 | 0.065 | 0.000 | 0.394 | 0.283 | 0.570 |
| n-Triacontane     | 0.000 | 0.000 | 0.462 | 1.799  | 0.000 | 0.000 | 2.491 | 0.220 | 0.000 | 0.000 | 0.000 | 0.000 | 0.572 | 0.000 | 0.794 |
| n-Dotriacontane   | 0.000 | 0.000 | 0.000 | 0.000  | 0.000 | 0.000 | 0.501 | 0.000 | 0.000 | 0.000 | 0.000 | 0.000 | 0.589 | 0.000 | 0.555 |
| n-Tetatriacontane | 0.000 | 0.000 | 0.000 | 0.000  | 0.000 | 0.000 | 0.000 | 0.000 | 0.000 | 0.000 | 0.000 | 0.000 | 0.000 | 0.000 | 0.000 |
| n-Hexatriacontane | 0.000 | 0.000 | 0.000 | 0.000  | 0.000 | 0.000 | 0.000 | 0.000 | 0.000 | 0.000 | 0.000 | 0.000 | 0.000 | 0.000 | 0.000 |
| n-Octatriacontane | 0.000 | 0.000 | 0.000 | 0.000  | 0.000 | 0.000 | 0.000 | 0.000 | 0.000 | 0.000 | 0.000 | 0.000 | 0.000 | 0.000 | 0.000 |
| n-Tetracontane    | 0.000 | 0.000 | 0.000 | 0.000  | 0.000 | 0.000 | 0.000 | 0.000 | 0.000 | 0.000 | 0.000 | 0.000 | 0.000 | 0.000 | 0.000 |
|                   |       |       |       |        |       |       |       |       |       |       |       |       |       |       |       |
| Benzene           | 0.000 | 0.032 | 0.000 | 0.000  | 0.000 | 0.000 | 0.000 | 0.000 | 0.000 | 0.000 | 0.000 | 0.000 | 0.146 | 0.000 | 0.000 |
| Toluene           | 1.007 | 5.198 | 3.643 | 33.353 | 1.274 | 2.364 | 2.016 | 0.862 | 1.774 | 0.860 | 0.600 | 0.983 | 1.756 | 2.948 | 0.750 |
| p + m Xylene      | 0.000 | 0.000 | 0.000 | 0.000  | 0.000 | 0.000 | 0.000 | 0.000 | 0.000 | 0.000 | 0.000 | 0.000 | 0.000 | 0.000 | 0.000 |
| Ethylbenzene      | 0.000 | 0.000 | 0.000 | 0.000  | 0.000 | 0.000 | 0.000 | 0.000 | 0.000 | 0.000 | 0.000 | 0.000 | 0.000 | 0.000 | 0.000 |
| o - Xylene        | 0.000 | 0.000 | 0.000 | 0.000  | 0.000 | 0.000 | 0.000 | 0.000 | 0.000 | 0.000 | 0.000 | 0.000 | 0.000 | 0.000 | 0.000 |

Supplementary Table 6. Hydrocarbon concentrations in seawater samples from oiled mesocosm C-III

| Conc µg/l                                        | Time(h) | 0           | 2           | 6           | 11          | 29          | 52          | 76          | 100         | 124         | 148      | 172          |
|--------------------------------------------------|---------|-------------|-------------|-------------|-------------|-------------|-------------|-------------|-------------|-------------|----------|--------------|
| TOP                                              |         | III wo<br>0 | III wo<br>1 | III wo<br>2 | III wo3     | III Wo<br>4 | III Wo<br>5 | III Wo<br>6 |             |             |          |              |
| Naphthalene                                      |         | 0.028       | 0.911       | 1.080       | 2.534       | 11.641      | 21.494      | 92.337      |             |             |          |              |
| Acenaphthylene                                   |         | 0.000       | 0.000       | 0.000       | 0.000       | 0.000       | 0.000       | 0.000       |             |             |          |              |
| Acenaphthene                                     |         | 0.000       | 0.000       | 0.000       | 0.001       | 0.001       | 0.007       | 0.000       |             |             |          |              |
| Fluorene                                         |         | 0.001       | 0.000       | 0.000       | 0.001       | 0.001       | 0.065       | 0.000       |             |             |          |              |
| Phenanthrene                                     |         | 0.006       | 0.001       | 0.000       | 0.003       | 0.260       | 0.154       | 0.003       |             |             |          |              |
| Anthracene                                       |         | 0.000       | 0.000       | 0.009       | 0.003       | 0.003       | 0.092       | 0.000       |             |             |          |              |
| Fluoranthene                                     |         | 0.000       | 0.000       | 0.000       | 0.000       | 0.000       | 0.118       | 0.000       |             |             |          |              |
| Pyrene                                           |         | 0.000       | 0.000       | 0.000       | 0.000       | 0.000       | 0.000       | 0.000       |             |             |          |              |
| Chrysene                                         |         | 0.000       | 0.000       | 0.000       | 0.000       | 0.000       | 0.000       | 0.000       |             |             |          |              |
| Benzo(a)anthracene                               |         | 0.000       | 0.000       | 0.000       | 0.000       | 0.000       | 0.000       | 0.000       |             |             |          |              |
| Benzo(b)fluoranthene                             |         | 0.000       | 0.000       | 0.000       | 0.000       | 0.000       | 0.000       | 0.000       |             |             |          |              |
| Benzo(k)fluoranthene                             |         | 0.000       | 0.000       | 0.000       | 0.000       | 0.000       | 0.000       | 0.000       |             |             |          |              |
| Benzo(a)pyrene                                   |         | 0.000       | 0.000       | 0.000       | 0.000       | 0.000       | 0.000       | 0.000       |             |             |          |              |
| Indeno(123-cd)pyrene                             |         | 0.000       | 0.000       | 0.000       | 0.000       | 0.000       | 0.000       | 0.000       |             |             |          |              |
| Dibenzo(ah)anthracene                            |         | 0.004       | 0.000       | 0.000       | 0.000       | 0.000       | 0.000       | 0.000       |             |             |          |              |
| Benzo(ghi)perylene                               |         | 0.004       | 0.000       | 0.000       | 0.000       | 0.000       | 0.000       | 0.000       |             |             |          |              |
| 2 Methylnaphthalene                              |         | 0.008       | 0.061       | 0.050       | 0.063       | 0.347       | 0.929       | 4.800       |             |             |          |              |
| 1 Methylnaphthalene                              |         | 0.004       | 0.048       | 0.039       | 0.050       | 0.409       | 0.898       | 4.026       |             |             |          |              |
| 2,6, Dimethylnaph<br>1,6,<br>Dimethylnaphthalene |         | 0.004       | 0.000       | 0.000       | 0.001       | 0.001       | 0.022       | 0.140       |             |             |          |              |
| 1,2,<br>Dimethylnaphthalene                      |         | 0.102       | 0.000       | 0.001       | 0.001       | 0.002       | 0.035       | 0.165       |             |             |          |              |
| 3 Methylanthracene                               |         | 0.000       | 0.000       | 0.000       | 0.000       | 0.000       | 0.003       | 0.000       |             |             |          |              |
| 3 Methylphenanthrene                             |         | 0.000       | 0.000       | 0.000       | 0.000       | 0.000       | 0.000       | 0.000       |             |             |          |              |
| 2 Methylphenanthrene                             |         | 0.000       | 0.000       | 0.000       | 0.000       | 0.000       | 0.000       | 0.000       |             |             |          |              |
| 9 Methylphenanthrene                             |         | 0.000       | 0.000       | 0.000       | 0.000       | 0.000       | 0.000       | 0.000       |             |             |          |              |
| 1 Methylphenanthrene                             |         | 0.000       | 0.000       | 0.000       | 0.000       | 0.000       | 0.000       | 0.000       |             |             |          |              |
| 1,7<br>Dimethylphenanthrene                      |         | 0.000       | 0.000       | 0.000       | 0.000       | 0.000       | 0.007       | 0.000       |             |             |          |              |
| 1+3<br>Methylfluoranthene                        |         | 0.000       | 0.000       | 0.000       | 0.000       | 0.000       | 0.000       | 0.000       |             |             |          |              |
| Retene                                           |         | 0.000       | 0.000       | 0.000       | 0.000       | 0.000       | 0.000       | 0.000       |             |             |          |              |
| 3 Methylpyrene                                   |         | 0.000       | 0.000       | 0.000       | 0.000       | 0.000       | 0.001       | 0.000       |             |             |          |              |
| 1 Methylpyrene                                   |         | 0.000       | 0.000       | 0.000       | 0.000       | 0.000       | 0.000       | 0.000       |             |             |          |              |
| 3 Methylchrysene                                 |         | 0.000       | 0.000       | 0.000       | 0.000       | 0.000       | 0.002       | 0.000       |             |             |          |              |
| 6 Methylchrysene                                 |         | 0.000       | 0.000       | 0.000       | 0.000       | 0.000       | 0.000       | 0.000       |             |             |          |              |
| n-Decane                                         |         | 0.000       | 0.334       | 0.271       | 0.401       | 0.957       | 0.172       | 0.143       |             |             |          |              |
| n-Dodecane                                       |         | 0.004       | 6.009       | 6.508       | 1.830       | 1.022       | 1.331       | 55.163      |             |             |          |              |
| n-Tetradecane                                    |         | 0.064       | 1.267       | 1.495       | 0.599       | 0.649       | 0.290       | 11.751      |             |             |          |              |
| n-Hexadecane                                     |         | 0.014       | 0.002       | 0.084       | 0.003       | 0.235       | 0.097       | 0.001       |             |             |          |              |
| n-Heptadecane                                    |         | 0.011       | 0.000       | 0.000       | 0.005       | 0.131       | 0.099       | 0.000       |             |             |          |              |
| Pristane                                         |         | 0.000       | 0.000       | 0.000       | 0.000       | 0.102       | 0.145       | 0.000       |             |             |          |              |
| n-Octadecane                                     |         | 0.011       | 0.000       | 0.002       | 0.000       | 2.305       | 0.262       | 0.000       |             |             |          |              |
| Phytane                                          |         | 0.000       | 0.000       | 0.000       | 0.000       | 0.918       | 0.273       | 0.000       |             |             |          |              |
| n-Eicosane                                       |         | 0.002       | 0.000       | 0.001       | 0.005       | 0.278       | 0.106       | 0.004       |             |             |          |              |
| n-Docosane                                       |         | 0.008       | 0.069       | 0.250       | 0.020       | 0.404       | 0.181       | 1.665       |             |             |          |              |
| n-Tetracosane                                    |         | 0.039       | 0.387       | 0.986       | 0.179       | 1.631       | 0.881       | 6.958       |             |             |          |              |
| n-Hexacosane                                     |         | 0.028       | 0.636       | 1.046       | 0.226       | 3.367       | 2.762       | 6.679       |             |             |          |              |
| n-Octacosane                                     |         | 0.054       | 0.478       | 0.847       | 0.243       | 2.728       | 14.555      | 5.497       |             |             |          |              |
| n-Triacontane                                    |         | 0.076       | 0.417       | 0.690       | 0.158       | 9.451       | 27.210      | 4.136       |             |             |          |              |
| n-Dotriacontane                                  |         | 0.053       | 0.445       | 0.558       | 0.121       | 4.919       | 13.377      | 3.320       |             |             |          |              |
| n-Tetratriacontane                               |         | 0.044       | 0.420       | 0.387       | 0.093       | 3.500       | 9.863       | 2.315       |             |             |          |              |
| n-Hexatriacontane                                |         | 0.033       | 0.235       | 0.192       | 0.042       | 2.974       | 8.078       | 1.151       |             |             |          |              |
| n-Octatriacontane                                |         | 0.026       | 0.142       | 0.115       | 0.026       | 1.936       | 3.957       | 0.497       |             |             |          |              |
| n-Tetracontane                                   |         | 0.000       | 0.088       | 0.000       | 0.000       | 1.059       | 1.706       | 0.000       |             |             |          |              |
|                                                  |         |             |             |             |             |             |             |             |             |             |          |              |
|                                                  |         |             |             |             |             |             |             |             |             |             |          |              |
|                                                  |         |             |             |             |             |             |             |             |             |             |          |              |
| BOTTOM                                           |         | III Wu<br>0 | III Wu<br>1 | III Wu<br>2 | III Wu<br>3 | III Wu<br>4 | III Wu<br>5 | III Wu<br>6 | III Wu<br>7 | III Wu<br>8 | III Wu 9 | III Wu<br>10 |
| Naphthalene                                      |         | 0.031       | 0.031       | 1.143       | 3.238       | 16.423      | 35.678      | -           | 71.738      | 59.927      | 107.131  | 107.414      |

|                          |  |       |       |       |       |       |       |   |       |       |        |       |
|--------------------------|--|-------|-------|-------|-------|-------|-------|---|-------|-------|--------|-------|
| Acenaphthylene           |  | 0.000 | 0.000 | 0.000 | 0.000 | 0.000 | 0.000 | - | 0.000 | 0.000 | 0.000  | 0.000 |
| Acenaphthene             |  | 0.000 | 0.000 | 0.000 | 0.000 | 0.001 | 0.000 | - | 0.000 | 0.000 | 0.000  | 0.154 |
| Fluorene                 |  | 0.001 | 0.007 | 0.000 | 0.000 | 0.007 | 0.002 | - | 0.011 | 0.175 | 0.032  | 0.154 |
| Phenanthrene             |  | 0.007 | 0.003 | 0.002 | 0.007 | 0.353 | 0.353 | - | 0.454 | 0.520 | 0.540  | 0.211 |
| Anthracene               |  | 0.000 | 0.003 | 0.003 | 0.000 | 0.003 | 0.246 | - | 0.376 | 0.460 | 0.544  | 0.008 |
| Fluoranthene             |  | 0.000 | 0.000 | 0.000 | 0.000 | 0.000 | 0.000 | - | 0.000 | 0.008 | 0.000  | 0.000 |
| Pyrene                   |  | 0.000 | 0.000 | 0.000 | 0.000 | 0.000 | 0.000 | - | 0.000 | 0.000 | 0.001  | 0.000 |
| Chrysene                 |  | 0.000 | 0.000 | 0.000 | 0.000 | 0.000 | 0.000 | - | 0.000 | 0.000 | 0.000  | 0.000 |
| Benzo(a)anthracene       |  | 0.000 | 0.000 | 0.000 | 0.000 | 0.000 | 0.000 | - | 0.000 | 0.000 | 0.000  | 0.000 |
| Benzo(b)fluoranthene     |  | 0.000 | 0.000 | 0.000 | 0.000 | 0.000 | 0.000 | - | 0.000 | 0.000 | 0.000  | 0.000 |
| Benzo(k)fluoranthene     |  | 0.000 | 0.000 | 0.000 | 0.000 | 0.000 | 0.000 | - | 0.000 | 0.000 | 0.000  | 0.000 |
| Benzo(a)pyrene           |  | 0.000 | 0.000 | 0.000 | 0.000 | 0.000 | 0.000 | - | 0.000 | 0.000 | 0.000  | 0.000 |
| Indeno(123-cd)pyrene     |  | 0.000 | 0.000 | 0.000 | 0.000 | 0.000 | 0.000 | - | 0.000 | 0.000 | 0.000  | 0.000 |
| Dibenzo(ah)anthracene    |  | 0.001 | 0.000 | 0.000 | 0.000 | 0.000 | 0.000 | - | 0.000 | 0.000 | 0.000  | 0.000 |
| Benzo(ghi)perylene       |  | 0.001 | 0.000 | 0.000 | 0.000 | 0.000 | 0.000 | - | 0.000 | 0.000 | 0.000  | 0.000 |
|                          |  |       |       |       |       |       |       |   |       |       |        |       |
| 2 Methylanthracene       |  | 0.009 | 0.050 | 0.054 | 0.048 | 1.413 | 2.828 | - | 7.776 | 6.758 | 6.778  | 5.167 |
| 1 Methylanthracene       |  | 0.005 | 0.037 | 0.042 | 0.030 | 1.363 | 2.883 | - | 7.515 | 6.853 | 26.100 | 6.005 |
| 2,6, Dimethylnaph        |  | 0.004 | 0.000 | 0.000 | 0.000 | 0.068 | 0.053 | - | 0.606 | 0.564 | 1.169  | 0.441 |
| 1,6, Dimethylnaphthalene |  | 0.093 | 0.000 | 0.000 | 0.000 | 0.120 | 0.093 | - | 0.830 | 0.818 | 1.630  | 0.745 |
| 1,2, Dimethylnaphthalene |  | 0.000 | 0.000 | 0.022 | 0.000 | 0.033 | 0.025 | - | 0.265 | 0.278 | 0.654  | 0.238 |
| 3 Methylanthracene       |  | 0.015 | 0.000 | 0.000 | 0.000 | 0.000 | 0.070 | - | 0.039 | 0.040 | 0.264  | 0.022 |
| 3 Methylphenanthrene     |  | 0.000 | 0.000 | 0.000 | 0.000 | 0.000 | 0.000 | - | 0.000 | 0.000 | 0.003  | 0.036 |
| 2 Methylphenanthrene     |  | 0.000 | 0.000 | 0.000 | 0.000 | 0.000 | 0.000 | - | 0.000 | 0.000 | 0.004  | 0.019 |
| 9 Methylphenanthrene     |  | 0.000 | 0.000 | 0.000 | 0.000 | 0.000 | 0.000 | - | 0.000 | 0.001 | 0.010  | 0.022 |
| 1 Methylphenanthrene     |  | 0.000 | 0.000 | 0.000 | 0.000 | 0.000 | 0.000 | - | 0.000 | 0.001 | 0.005  | 0.053 |
| 1,7 Dimethylphenanthrene |  | 0.000 | 0.000 | 0.000 | 0.000 | 0.000 | 0.000 | - | 0.139 | 0.193 | 0.716  | 0.000 |
| 1+3 Methylfluoranthene   |  | 0.000 | 0.000 | 0.000 | 0.000 | 0.000 | 0.000 | - | 0.000 | 0.000 | 0.000  | 0.000 |
| Retene                   |  | 0.000 | 0.000 | 0.000 | 0.000 | 0.000 | 0.000 | - | 0.000 | 0.000 | 0.000  | 0.000 |
| 3 Methylpyrene           |  | 0.000 | 0.000 | 0.000 | 0.000 | 0.000 | 0.000 | - | 0.013 | 0.017 | 0.051  | 0.000 |
| 1 Methylpyrene           |  | 0.000 | 0.000 | 0.000 | 0.000 | 0.000 | 0.000 | - | 0.000 | 0.137 | 0.000  | 0.000 |
| 3 Methylchrysene         |  | 0.000 | 0.000 | 0.000 | 0.000 | 0.000 | 0.000 | - | 0.000 | 0.000 | 0.000  | 0.000 |
| 6 Methylchrysene         |  | 0.000 | 0.000 | 0.000 | 0.000 | 0.000 | 0.000 | - | 0.000 | 0.000 | 0.000  | 0.000 |
|                          |  |       |       |       |       |       |       |   |       |       |        |       |
| n-Decane                 |  | 0.000 | 0.428 | 5.541 | 4.120 | 0.630 | 2.204 | - | 1.278 | 0.752 | 0.279  | 0.004 |
| n-Dodecane               |  | 0.010 | 5.085 | 8.341 | 3.138 | 2.519 | 3.302 | - | 1.407 | 1.309 | 0.527  | 0.434 |
| n-Tetradecane            |  | 0.673 | 1.059 | 1.756 | 0.647 | 1.159 | 1.518 | - | 1.453 | 1.484 | 0.667  | 1.122 |
| n-Hexadecane             |  | 0.015 | 0.095 | 0.002 | 0.022 | 0.299 | 0.737 | - | 9.358 | 5.327 | 2.459  | 0.004 |
| n-Heptadecane            |  | 0.002 | 0.002 | 0.005 | 0.010 | 0.273 | 0.277 | - | 1.122 | 1.502 | 0.758  | 0.002 |
| Pristane                 |  | 0.000 | 0.002 | 0.003 | 0.002 | 0.194 | 0.203 | - | 1.026 | 0.480 | 0.165  | 0.000 |
| n-Octadecane             |  | 0.002 | 0.005 | 0.003 | 0.008 | 0.341 | 0.243 | - | 0.666 | 0.521 | 0.252  | 0.013 |
| Phytane                  |  | 0.000 | 0.001 | 0.000 | 0.003 | 0.072 | 0.008 | - | 0.005 | 0.007 | 0.223  | 0.000 |
| n-Eicosane               |  | 0.012 | 0.003 | 0.004 | 0.005 | 0.593 | 0.459 | - | 1.034 | 0.002 | 0.002  | 0.001 |
| n-Docosane               |  | 0.031 | 0.031 | 0.006 | 0.027 | 2.401 | 0.903 | - | 3.526 | 0.391 | 1.327  | 0.006 |
| n-Tetracosane            |  | 0.080 | 0.237 | 0.420 | 0.227 | 7.410 | 8.940 | - | 7.419 | 2.228 | 3.271  | 0.073 |
| n-Hexacosane             |  | 0.084 | 0.457 | 0.524 | 0.395 | 6.505 | 4.478 | - | 5.960 | 1.584 | 2.266  | 0.101 |
| n-Octacosane             |  | 0.115 | 0.404 | 0.475 | 0.313 | 7.252 | 7.754 | - | 6.203 | 1.982 | 1.847  | 0.126 |
| n-Triacontane            |  | 0.115 | 0.340 | 0.394 | 0.258 | 6.923 | 7.450 | - | 5.586 | 2.660 | 1.329  | 0.134 |
| n-Dotriacontane          |  | 0.109 | 0.251 | 0.283 | 0.190 | 3.411 | 0.877 | - | 3.056 | 2.518 | 0.710  | 0.053 |
| n-Tetratriacontane       |  | 0.096 | 0.167 | 0.186 | 0.120 | 1.999 | 2.820 | - | 2.177 | 2.918 | 0.576  | 0.042 |
| n-Hexatriacontane        |  | 0.067 | 0.088 | 0.117 | 0.070 | 1.750 | 4.821 | - | 1.300 | 1.643 | 0.375  | 0.038 |
| n-Octatriacontane        |  | 0.038 | 0.000 | 0.005 | 0.043 | 1.128 | 2.421 | - | 0.821 | 1.139 | 0.251  | 0.014 |
| n-Tetracontane           |  | 0.000 | 0.000 | 0.000 | 0.004 | 0.427 | 0.153 | - | 0.351 | 0.636 | 0.151  | 0.151 |

## Supplementary References

1. Wang, Z. *et al.* Characteristics of Spilled Oils, Fuels, and Petroleum Products:1. Composition and Properties of Selected Oils. (Emergencies Science and Technology Division, Environmental Technology Centre, Environment Canada 335 River Road, Ottawa, Ontario, 2003). Document: EPA/600/R-03/072.
2. Gros, J. *et al.* First day of an oil spill on the open sea: Early mass transfers of hydrocarbons to air and water. *Environ Sci Technol* **48**, 9400-9411(2014).
